# Supplementary material
Source: publisher figshare collection journal article supplement (https://acs.figshare.com/ndownloader/files/5074069)
Supplement: Supplementary file 1 [file 5074069]

#=======================================================================
#  Data block for (6) (one for each study in the paper)
#=======================================================================
 
data_jd12plt(6)
 
_audit_creation_method            SHELXL-97
_chemical_name_systematic
;
 (1R*, 5R*)-7,7-diethylnyl-5-hydroxymethyl-6-
oxabicyclo[3.2.1]octane-1-carboxylic acid

;
_chemical_name_common             ?
_chemical_melting_point           ?
_chemical_formula_moiety          'C13 H14 O4'
_chemical_formula_sum
 'C13 H14 O4'
_chemical_formula_weight          234.24
 
loop_
 _atom_type_symbol
 _atom_type_description
 _atom_type_scat_dispersion_real
 _atom_type_scat_dispersion_imag
 _atom_type_scat_source
 'C'  'C'   0.0033   0.0000
 'International Tables Vol C Tables 4.2.6.8 and 6.1.1.4'
 'H'  'H'   0.0000   0.0000
 'International Tables Vol C Tables 4.2.6.8 and 6.1.1.4'
 'O'  'O'   0.0106   0.0000
 'International Tables Vol C Tables 4.2.6.8 and 6.1.1.4'
 
_symmetry_cell_setting            'Triclinic'
_symmetry_space_group_name_H-M    'P -1'
 
loop_
 _symmetry_equiv_pos_as_xyz
 'x, y, z'
 '-x, -y, -z'
 
_cell_length_a                    7.2000(11)
_cell_length_b                    8.0090(16)
_cell_length_c                    11.1220(19)
_cell_angle_alpha                 88.642(7)
_cell_angle_beta                  100.505(10)
_cell_angle_gamma                 105.620(12)
_cell_volume                      607.09(18)
_cell_formula_units_Z             2
_cell_measurement_temperature     170(2)
_cell_measurement_reflns_used     2545
_cell_measurement_theta_min       1.86
_cell_measurement_theta_max       27.5
_computing_cell_refinement 'HKL Denzo and Scalepack (Otwinowski & Minor 1997)'
 
_exptl_crystal_description        'rhombohedral-plate'
_exptl_crystal_colour             colourless
_exptl_crystal_size_max           0.40
_exptl_crystal_size_mid           0.40
_exptl_crystal_size_min           0.10
_exptl_crystal_density_meas       ?
_exptl_crystal_density_diffrn     1.281
_exptl_crystal_density_method     'not measured'
_exptl_crystal_F_000              248
_exptl_absorpt_coefficient_mu     0.095
_exptl_absorpt_correction_type    none
_exptl_absorpt_correction_T_min   0.9630
_exptl_absorpt_correction_T_max   0.9906
_exptl_absorpt_process_details    ?
 
_exptl_special_details
;
 ?
;
 
_diffrn_ambient_temperature       170(2)
_diffrn_radiation_wavelength      0.71073
_diffrn_radiation_type            MoK\a
_diffrn_radiation_source          'fine-focus sealed tube'
_diffrn_measurement_device_type  'KappaCCD'
_diffrn_measurement_device  '95mm CCD camera on \k-goniostat'
_diffrn_detector_area_resol_mean    9
_diffrn_radiation_monochromator        'horizontally mounted graphite crystal'
_diffrn_measurement_method     '\f and \w'
_diffrn_reflns_number             2759
_diffrn_reflns_av_R_equivalents   0.0000
_diffrn_reflns_av_sigmaI/netI     0.0211
_diffrn_reflns_limit_h_min        -9
_diffrn_reflns_limit_h_max        0
_diffrn_reflns_limit_k_min        -9
_diffrn_reflns_limit_k_max        10
_diffrn_reflns_limit_l_min        -14
_diffrn_reflns_limit_l_max        14
_diffrn_reflns_theta_min          1.86
_diffrn_reflns_theta_max          27.50
_reflns_number_total              2759
_reflns_number_gt                 2612
_reflns_threshold_expression      >2sigma(I)
 
_computing_data_collection 'Collect (Nonius BV, 2000)'
_computing_data_reduction  'HKL Denzo and Scalepak (Otwinowski & Minor, 1997)'
_computing_structure_solution     'SIR97 (Altomare et al., 1999)'
_computing_structure_refinement   'SHELXL-97 (Sheldrick, 1997)'
_computing_molecular_graphics  
  'PLATON (Spek, 2003)'
_computing_publication_material  
'SHELXL-97, WinGX (Farrugia, 1999) and PLATON'

  
_refine_special_details
;
 Refinement of F^2^ against ALL reflections.  The weighted R-factor wR and
 goodness of fit S are based on F^2^, conventional R-factors R are based
 on F, with F set to zero for negative F^2^. The threshold expression of
 F^2^ > 2sigma(F^2^) is used only for calculating R-factors(gt) etc. and is
 not relevant to the choice of reflections for refinement.  R-factors based
 on F^2^ are statistically about twice as large as those based on F, and R-
 factors based on ALL data will be even larger.
;
 
_refine_ls_structure_factor_coef  Fsqd
_refine_ls_matrix_type            full
_refine_ls_weighting_scheme       calc
_refine_ls_weighting_details
 'calc w=1/[\s^2^(Fo^2^)+(0.0823P)^2^+0.3143P] where P=(Fo^2^+2Fc^2^)/3'
_atom_sites_solution_primary      direct
_atom_sites_solution_secondary    difmap
_atom_sites_solution_hydrogens    geom
_refine_ls_hydrogen_treatment     riding
_refine_ls_extinction_method      SHELXL
_refine_ls_extinction_coef        0.30(3)
_refine_ls_extinction_expression
 'Fc^*^=kFc[1+0.001xFc^2^\l^3^/sin(2\q)]^-1/4^'
_refine_ls_number_reflns          2759
_refine_ls_number_parameters      157
_refine_ls_number_restraints      0
_refine_ls_R_factor_all           0.0515
_refine_ls_R_factor_gt            0.0485
_refine_ls_wR_factor_ref          0.1378
_refine_ls_wR_factor_gt           0.1290
_refine_ls_goodness_of_fit_ref    1.025
_refine_ls_restrained_S_all       1.025
_refine_ls_shift/su_max           0.001
_refine_ls_shift/su_mean          0.000
 
loop_
 _atom_site_label
 _atom_site_type_symbol
 _atom_site_fract_x
 _atom_site_fract_y
 _atom_site_fract_z
 _atom_site_U_iso_or_equiv
 _atom_site_adp_type
 _atom_site_occupancy
 _atom_site_symmetry_multiplicity
 _atom_site_calc_flag
 _atom_site_refinement_flags
 _atom_site_disorder_assembly
 _atom_site_disorder_group
O1 O 0.31964(14) 0.37276(12) 0.35294(8) 0.0178(3) Uani 1 1 d . . .
O2 O 0.67203(16) 0.66379(15) 0.39117(10) 0.0288(3) Uani 1 1 d . . .
H2 H 0.6784 0.6405 0.4656 0.035 Uiso 1 1 calc R . .
O3 O 0.52877(16) 0.20808(13) 0.02657(10) 0.0258(3) Uani 1 1 d . . .
O4 O 0.31935(17) -0.01662(13) 0.09495(10) 0.0282(3) Uani 1 1 d . . .
H4 H 0.3726 -0.0737 0.0562 0.042 Uiso 1 1 calc R . .
C1 C 0.3533(2) 0.51697(16) 0.26830(12) 0.0181(3) Uani 1 1 d . . .
C2 C 0.1537(2) 0.54170(18) 0.20928(14) 0.0248(3) Uani 1 1 d . . .
H2A H 0.1705 0.6265 0.1432 0.030 Uiso 1 1 calc R . .
H2B H 0.0967 0.5884 0.2712 0.030 Uiso 1 1 calc R . .
C3 C 0.0140(2) 0.3689(2) 0.15638(14) 0.0256(3) Uani 1 1 d . . .
H3A H -0.0978 0.3924 0.0989 0.031 Uiso 1 1 calc R . .
H3B H -0.0390 0.3004 0.2238 0.031 Uiso 1 1 calc R . .
C4 C 0.1115(2) 0.26060(18) 0.08915(13) 0.0219(3) Uani 1 1 d . . .
H4A H 0.1185 0.3055 0.0059 0.026 Uiso 1 1 calc R . .
H4B H 0.0295 0.1390 0.0807 0.026 Uiso 1 1 calc R . .
C5 C 0.32045(18) 0.26449(16) 0.15657(11) 0.0153(3) Uani 1 1 d . . .
C6 C 0.4470(2) 0.45176(16) 0.17373(12) 0.0175(3) Uani 1 1 d . . .
H6A H 0.5865 0.4582 0.2053 0.021 Uiso 1 1 calc R . .
H6B H 0.4358 0.5162 0.0969 0.021 Uiso 1 1 calc R . .
C7 C 0.40202(19) 0.14936(16) 0.08735(11) 0.0169(3) Uani 1 1 d . . .
C8 C 0.4811(2) 0.67781(18) 0.34119(13) 0.0259(3) Uani 1 1 d . . .
H8A H 0.4922 0.7789 0.2874 0.031 Uiso 1 1 calc R . .
H8B H 0.4168 0.6992 0.4086 0.031 Uiso 1 1 calc R . .
C9 C 0.32505(18) 0.21478(16) 0.29412(11) 0.0159(3) Uani 1 1 d . . .
C10 C 0.1586(2) 0.07119(17) 0.31627(12) 0.0205(3) Uani 1 1 d . . .
C11 C 0.0280(2) -0.04779(19) 0.33319(14) 0.0270(3) Uani 1 1 d . . .
H11 H -0.0768 -0.1433 0.3468 0.032 Uiso 1 1 calc R . .
C12 C 0.5115(2) 0.17358(17) 0.34644(12) 0.0200(3) Uani 1 1 d . . .
C13 C 0.6609(2) 0.1425(2) 0.38762(15) 0.0318(4) Uani 1 1 d . . .
H13 H 0.7813 0.1174 0.4208 0.038 Uiso 1 1 calc R . .
 
loop_
 _atom_site_aniso_label
 _atom_site_aniso_U_11
 _atom_site_aniso_U_22
 _atom_site_aniso_U_33
 _atom_site_aniso_U_23
 _atom_site_aniso_U_13
 _atom_site_aniso_U_12
O1 0.0260(5) 0.0152(5) 0.0151(5) 0.0015(3) 0.0083(4) 0.0077(4)
O2 0.0313(6) 0.0296(6) 0.0188(5) -0.0009(4) 0.0063(4) -0.0046(4)
O3 0.0345(6) 0.0182(5) 0.0294(6) 0.0004(4) 0.0189(4) 0.0063(4)
O4 0.0374(6) 0.0149(5) 0.0366(6) -0.0030(4) 0.0223(5) 0.0035(4)
C1 0.0252(7) 0.0143(6) 0.0160(6) 0.0020(5) 0.0066(5) 0.0058(5)
C2 0.0315(7) 0.0214(7) 0.0261(7) 0.0027(5) 0.0062(6) 0.0146(6)
C3 0.0214(7) 0.0271(7) 0.0302(8) 0.0013(6) 0.0022(5) 0.0118(6)
C4 0.0216(6) 0.0223(7) 0.0209(6) -0.0007(5) -0.0014(5) 0.0079(5)
C5 0.0186(6) 0.0141(6) 0.0143(6) 0.0006(4) 0.0047(4) 0.0050(5)
C6 0.0238(6) 0.0141(6) 0.0153(6) 0.0013(4) 0.0072(5) 0.0038(5)
C7 0.0208(6) 0.0153(6) 0.0143(6) -0.0004(4) 0.0031(5) 0.0047(5)
C8 0.0377(8) 0.0172(7) 0.0221(7) -0.0024(5) 0.0069(6) 0.0051(6)
C9 0.0198(6) 0.0144(6) 0.0156(6) 0.0016(4) 0.0064(5) 0.0062(5)
C10 0.0234(7) 0.0195(7) 0.0215(7) 0.0033(5) 0.0082(5) 0.0083(5)
C11 0.0273(7) 0.0220(7) 0.0334(8) 0.0055(6) 0.0131(6) 0.0051(6)
C12 0.0262(7) 0.0190(6) 0.0170(6) 0.0023(5) 0.0068(5) 0.0081(5)
C13 0.0319(8) 0.0395(9) 0.0292(8) 0.0010(6) 0.0026(6) 0.0201(7)
 
_geom_special_details
;
 All esds (except the esd in the dihedral angle between two l.s. planes)
 are estimated using the full covariance matrix.  The cell esds are taken
 into account individually in the estimation of esds in distances, angles
 and torsion angles; correlations between esds in cell parameters are only
 used when they are defined by crystal symmetry.  An approximate (isotropic)
 treatment of cell esds is used for estimating esds involving l.s. planes.
;
 
loop_
 _geom_bond_atom_site_label_1
 _geom_bond_atom_site_label_2
 _geom_bond_distance
 _geom_bond_site_symmetry_2
 _geom_bond_publ_flag
O1 C9 1.4509(15) . ?
O1 C1 1.4696(15) . ?
O2 C8 1.4188(19) . ?
O2 H2 0.8400 . ?
O3 C7 1.2206(17) . ?
O4 C7 1.3097(17) . ?
O4 H4 0.8400 . ?
C1 C8 1.5173(19) . ?
C1 C6 1.5192(18) . ?
C1 C2 1.5296(19) . ?
C2 C3 1.532(2) . ?
C2 H2A 0.9900 . ?
C2 H2B 0.9900 . ?
C3 C4 1.534(2) . ?
C3 H3A 0.9900 . ?
C3 H3B 0.9900 . ?
C4 C5 1.5462(18) . ?
C4 H4A 0.9900 . ?
C4 H4B 0.9900 . ?
C5 C7 1.5093(17) . ?
C5 C6 1.5265(17) . ?
C5 C9 1.5684(17) . ?
C6 H6A 0.9900 . ?
C6 H6B 0.9900 . ?
C8 H8A 0.9900 . ?
C8 H8B 0.9900 . ?
C9 C10 1.4736(18) . ?
C9 C12 1.4816(18) . ?
C10 C11 1.184(2) . ?
C11 H11 0.9500 . ?
C12 C13 1.178(2) . ?
C13 H13 0.9500 . ?
 
loop_
 _geom_angle_atom_site_label_1
 _geom_angle_atom_site_label_2
 _geom_angle_atom_site_label_3
 _geom_angle
 _geom_angle_site_symmetry_1
 _geom_angle_site_symmetry_3
 _geom_angle_publ_flag
C9 O1 C1 109.73(9) . . ?
C8 O2 H2 109.5 . . ?
C7 O4 H4 109.5 . . ?
O1 C1 C8 108.11(11) . . ?
O1 C1 C6 103.46(10) . . ?
C8 C1 C6 115.03(12) . . ?
O1 C1 C2 107.93(11) . . ?
C8 C1 C2 111.32(11) . . ?
C6 C1 C2 110.45(11) . . ?
C1 C2 C3 110.49(11) . . ?
C1 C2 H2A 109.6 . . ?
C3 C2 H2A 109.6 . . ?
C1 C2 H2B 109.6 . . ?
C3 C2 H2B 109.6 . . ?
H2A C2 H2B 108.1 . . ?
C2 C3 C4 113.45(12) . . ?
C2 C3 H3A 108.9 . . ?
C4 C3 H3A 108.9 . . ?
C2 C3 H3B 108.9 . . ?
C4 C3 H3B 108.9 . . ?
H3A C3 H3B 107.7 . . ?
C3 C4 C5 112.49(11) . . ?
C3 C4 H4A 109.1 . . ?
C5 C4 H4A 109.1 . . ?
C3 C4 H4B 109.1 . . ?
C5 C4 H4B 109.1 . . ?
H4A C4 H4B 107.8 . . ?
C7 C5 C6 113.81(10) . . ?
C7 C5 C4 109.01(10) . . ?
C6 C5 C4 109.68(10) . . ?
C7 C5 C9 112.49(10) . . ?
C6 C5 C9 99.45(10) . . ?
C4 C5 C9 112.18(10) . . ?
C1 C6 C5 100.00(10) . . ?
C1 C6 H6A 111.8 . . ?
C5 C6 H6A 111.8 . . ?
C1 C6 H6B 111.8 . . ?
C5 C6 H6B 111.8 . . ?
H6A C6 H6B 109.5 . . ?
O3 C7 O4 123.77(12) . . ?
O3 C7 C5 122.20(12) . . ?
O4 C7 C5 113.98(11) . . ?
O2 C8 C1 112.97(12) . . ?
O2 C8 H8A 109.0 . . ?
C1 C8 H8A 109.0 . . ?
O2 C8 H8B 109.0 . . ?
C1 C8 H8B 109.0 . . ?
H8A C8 H8B 107.8 . . ?
O1 C9 C10 109.59(10) . . ?
O1 C9 C12 108.83(10) . . ?
C10 C9 C12 109.48(11) . . ?
O1 C9 C5 103.39(9) . . ?
C10 C9 C5 114.69(11) . . ?
C12 C9 C5 110.60(10) . . ?
C11 C10 C9 177.89(15) . . ?
C10 C11 H11 180.0 . . ?
C13 C12 C9 179.29(16) . . ?
C12 C13 H13 180.0 . . ?
 
loop_
 _geom_torsion_atom_site_label_1
 _geom_torsion_atom_site_label_2
 _geom_torsion_atom_site_label_3
 _geom_torsion_atom_site_label_4
 _geom_torsion
 _geom_torsion_site_symmetry_1
 _geom_torsion_site_symmetry_2
 _geom_torsion_site_symmetry_3
 _geom_torsion_site_symmetry_4
 _geom_torsion_publ_flag
C9 O1 C1 C8 -141.14(11) . . . . ?
C9 O1 C1 C6 -18.73(13) . . . . ?
C9 O1 C1 C2 98.34(11) . . . . ?
O1 C1 C2 C3 -51.10(14) . . . . ?
C8 C1 C2 C3 -169.59(12) . . . . ?
C6 C1 C2 C3 61.35(15) . . . . ?
C1 C2 C3 C4 -42.28(16) . . . . ?
C2 C3 C4 C5 41.02(16) . . . . ?
C3 C4 C5 C7 177.68(11) . . . . ?
C3 C4 C5 C6 -57.10(15) . . . . ?
C3 C4 C5 C9 52.42(15) . . . . ?
O1 C1 C6 C5 41.76(12) . . . . ?
C8 C1 C6 C5 159.44(11) . . . . ?
C2 C1 C6 C5 -73.53(12) . . . . ?
C7 C5 C6 C1 -167.42(10) . . . . ?
C4 C5 C6 C1 70.17(12) . . . . ?
C9 C5 C6 C1 -47.60(11) . . . . ?
C6 C5 C7 O3 -16.49(18) . . . . ?
C4 C5 C7 O3 106.29(14) . . . . ?
C9 C5 C7 O3 -128.63(13) . . . . ?
C6 C5 C7 O4 166.01(11) . . . . ?
C4 C5 C7 O4 -71.21(14) . . . . ?
C9 C5 C7 O4 53.87(15) . . . . ?
O1 C1 C8 O2 65.26(14) . . . . ?
C6 C1 C8 O2 -49.76(16) . . . . ?
C2 C1 C8 O2 -176.36(11) . . . . ?
C1 O1 C9 C10 -134.33(11) . . . . ?
C1 O1 C9 C12 105.98(11) . . . . ?
C1 O1 C9 C5 -11.61(12) . . . . ?
C7 C5 C9 O1 157.74(10) . . . . ?
C6 C5 C9 O1 36.95(11) . . . . ?
C4 C5 C9 O1 -78.93(12) . . . . ?
C7 C5 C9 C10 -83.00(13) . . . . ?
C6 C5 C9 C10 156.21(11) . . . . ?
C4 C5 C9 C10 40.33(14) . . . . ?
C7 C5 C9 C12 41.40(14) . . . . ?
C6 C5 C9 C12 -79.39(12) . . . . ?
C4 C5 C9 C12 164.72(11) . . . . ?
O1 C9 C10 C11 -160(4) . . . . ?
C12 C9 C10 C11 -41(4) . . . . ?
C5 C9 C10 C11 84(4) . . . . ?
O1 C9 C12 C13 -60(13) . . . . ?
C10 C9 C12 C13 180(100) . . . . ?
C5 C9 C12 C13 53(13) . . . . ?
 
loop_
 _geom_hbond_atom_site_label_D
 _geom_hbond_atom_site_label_H
 _geom_hbond_atom_site_label_A
 _geom_hbond_distance_DH
 _geom_hbond_distance_HA
 _geom_hbond_distance_DA
 _geom_hbond_angle_DHA
 _geom_hbond_site_symmetry_A
O2 H2 O1  0.84 2.02 2.8455(15) 169.2 2_666
O4 H4 O3  0.84 1.79 2.6294(14) 175.9 2_655
 
_diffrn_measured_fraction_theta_max    0.990
_diffrn_reflns_theta_full              27.50
_diffrn_measured_fraction_theta_full   0.990
_refine_diff_density_max    0.358
_refine_diff_density_min   -0.300
_refine_diff_density_rms    0.108 
 
#-end-end-end-end-end-end-end-end-end-end-end-end-end-end-end-end-end-end
 
#=======================================================================
#  Data block for (7) (one for each study in the paper)
#=======================================================================
data_sn2lt(7)
 
_audit_creation_method            SHELXL-97
_chemical_name_systematic
;
 (1R*, 5R*, 7S*)-7-ethyl-5-hydroxymethyl-7-vinyl-6-
oxabicyclo[3.2.1]octane-1-carboxylic acid
;

_chemical_name_common             ?

_chemical_melting_point           ?
_chemical_formula_moiety 'C13 H14 O4 '                                          
_chemical_formula_sum    'C13 H14 O4 '

_chemical_formula_weight          240.29

loop_
 _atom_type_symbol
 _atom_type_description
 _atom_type_scat_dispersion_real
 _atom_type_scat_dispersion_imag
 _atom_type_scat_source
 'C'  'C'   0.0033   0.0000
 'International Tables Vol C Tables 4.2.6.8 and 6.1.1.4'
 'H'  'H'   0.0000   0.0000
 'International Tables Vol C Tables 4.2.6.8 and 6.1.1.4'
 'O'  'O'   0.0106   0.0000
 'International Tables Vol C Tables 4.2.6.8 and 6.1.1.4'

_symmetry_cell_setting            'Triclinic'
_symmetry_space_group_name_H-M    'P -1'


 loop_
 _symmetry_equiv_pos_as_xyz
 'x, y, z'
 '-x, -y, -z'
 
_cell_length_a                    7.686(3)
_cell_length_b                    7.823(2)
_cell_length_c                    12.384(2)
_cell_angle_alpha                 108.900(14)
_cell_angle_beta                  89.388(16)
_cell_angle_gamma                 108.722(13)
_cell_volume                      663.6(3)
_cell_formula_units_Z             2
_cell_measurement_temperature     170(2)
_cell_measurement_reflns_used     2545
_cell_measurement_theta_min        1.75
_cell_measurement_theta_max       27.5

_computing_cell_refinement 'HKL Denzo and Scalepack (Otwinowski & Minor 1997)'
  
_exptl_crystal_description        plate
_exptl_crystal_colour             colourless
_exptl_crystal_size_max           0.40
_exptl_crystal_size_mid           0.30
_exptl_crystal_size_min           0.05
_exptl_crystal_density_meas       ?
_exptl_crystal_density_diffrn     1.203
_exptl_crystal_density_method     'not measured'
_exptl_crystal_F_000              260
_exptl_absorpt_coefficient_mu     0.087
_exptl_absorpt_correction_type    none
_exptl_absorpt_correction_T_min   0.9657
_exptl_absorpt_correction_T_max   0.9956
_exptl_absorpt_process_details    ?
 
_exptl_special_details
;
 ?
;
 
_diffrn_ambient_temperature       170(2)
_diffrn_radiation_wavelength      0.71073
_diffrn_radiation_type            MoK\a
_diffrn_radiation_source          'fine-focus sealed tube'
_diffrn_measurement_device_type  'KappaCCD'
_diffrn_measurement_device  '95mm CCD camera on \k-goniostat'
_diffrn_detector_area_resol_mean    9
_diffrn_radiation_monochromator        'horizontally mounted graphite crystal'
_diffrn_measurement_method     '\f and \w'
 

_diffrn_reflns_number             2968
_diffrn_reflns_av_R_equivalents   0.0000
_diffrn_reflns_av_sigmaI/netI     0.0235
_diffrn_reflns_limit_h_min        -9
_diffrn_reflns_limit_h_max        0
_diffrn_reflns_limit_k_min        -9
_diffrn_reflns_limit_k_max        10
_diffrn_reflns_limit_l_min        -16
_diffrn_reflns_limit_l_max        15
_diffrn_reflns_theta_min          1.75
_diffrn_reflns_theta_max          27.50
_reflns_number_total              2968
_reflns_number_gt                 2802
_reflns_threshold_expression      >2sigma(I)
 
_computing_data_collection 'Collect (Nonius BV, 2000)'
_computing_data_reduction  'HKL Denzo and Scalepak (Otwinowski & Minor, 1997)'
_computing_structure_solution     'SIR97 (Altomare et al., 1999)'
_computing_structure_refinement   'SHELXL-97 (Sheldrick, 1997)'
_computing_molecular_graphics  
  'PLATON (Spek, 2003)'
_computing_publication_material  
'SHELXL-97, WinGX (Farrugia, 1999) and PLATON'

  
_refine_special_details
;
The ethyl and vinyl appendages appear to be disordered. Bond distances in both 
substituents were restrained using the DFIX command based on the equivalent 
bonds in the iodide derivative, SN1(38). Attempted free refinement, including 
anisotrpic displacement parameters for the C13A position, led to unrealistic 
geometrical parameters.

 Refinement of F^2^ against ALL reflections.  The weighted R-factor wR and
 goodness of fit S are based on F^2^, conventional R-factors R are based
 on F, with F set to zero for negative F^2^. The threshold expression of
 F^2^ > 2sigma(F^2^) is used only for calculating R-factors(gt) etc. and is
 not relevant to the choice of reflections for refinement.  R-factors based
 on F^2^ are statistically about twice as large as those based on F, and R-
 factors based on ALL data will be even larger.
;
 
_refine_ls_structure_factor_coef  Fsqd
_refine_ls_matrix_type            full
_refine_ls_weighting_scheme       calc
_refine_ls_weighting_details
 'calc w=1/[\s^2^(Fo^2^)+(0.0833P)^2^+1.3270P] where P=(Fo^2^+2Fc^2^)/3'
_atom_sites_solution_primary      direct
_atom_sites_solution_secondary    difmap
_atom_sites_solution_hydrogens    geom
_refine_ls_hydrogen_treatment     riding
_refine_ls_extinction_method      none
_refine_ls_extinction_coef        ?
_refine_ls_number_reflns          2968
_refine_ls_number_parameters      160
_refine_ls_number_restraints      6
_refine_ls_R_factor_all           0.1063
_refine_ls_R_factor_gt            0.1026
_refine_ls_wR_factor_ref          0.2417
_refine_ls_wR_factor_gt           0.2394
_refine_ls_goodness_of_fit_ref    1.063
_refine_ls_restrained_S_all       1.112
_refine_ls_shift/su_max           0.001
_refine_ls_shift/su_mean          0.000
 
loop_
 _atom_site_label
 _atom_site_type_symbol
 _atom_site_fract_x
 _atom_site_fract_y
 _atom_site_fract_z
 _atom_site_U_iso_or_equiv
 _atom_site_adp_type
 _atom_site_occupancy
 _atom_site_symmetry_multiplicity
 _atom_site_calc_flag
 _atom_site_refinement_flags
 _atom_site_disorder_assembly
 _atom_site_disorder_group
O1 O 0.0995(3) -0.0389(3) 0.31110(16) 0.0380(6) Uani 1 1 d . . .
O2 O -0.2720(3) -0.4132(3) 0.1012(2) 0.0455(7) Uani 1 1 d . . .
H2 H -0.2939 -0.3711 0.0504 0.055 Uiso 1 1 calc R . .
O4 O 0.5448(3) 0.3083(4) 0.1694(2) 0.0535(8) Uani 1 1 d . . .
H4 H 0.5905 0.3883 0.1363 0.064 Uiso 1 1 calc R . .
O3 O 0.2973(3) 0.2350(3) 0.05076(19) 0.0394(6) Uani 1 1 d . . .
C1 C 0.0251(4) -0.1820(4) 0.2002(2) 0.0267(6) Uani 1 1 d . . .
C2 C 0.1121(4) -0.3391(4) 0.1813(3) 0.0384(7) Uani 1 1 d . . .
H2A H 0.0649 -0.4126 0.2334 0.046 Uiso 1 1 calc R . .
H2B H 0.0777 -0.4289 0.1013 0.046 Uiso 1 1 calc R . .
C3 C 0.3228(5) -0.2488(5) 0.2045(4) 0.0509(10) Uani 1 1 d . . .
H3A H 0.3784 -0.3492 0.1693 0.061 Uiso 1 1 calc R . .
H3B H 0.3577 -0.2006 0.2884 0.061 Uiso 1 1 calc R . .
C4 C 0.4035(4) -0.0832(5) 0.1579(3) 0.0407(8) Uani 1 1 d . . .
H4A H 0.4165 -0.1372 0.0753 0.049 Uiso 1 1 calc R . .
H4B H 0.5286 -0.0045 0.1979 0.049 Uiso 1 1 calc R . .
C5 C 0.2849(3) 0.0477(4) 0.1729(2) 0.0243(5) Uani 1 1 d . . .
C6 C 0.0903(3) -0.0763(4) 0.1157(2) 0.0259(6) Uani 1 1 d . . .
H6A H 0.0140 0.0022 0.1110 0.031 Uiso 1 1 calc R . .
H6B H 0.0918 -0.1654 0.0381 0.031 Uiso 1 1 calc R . .
C7 C 0.3736(4) 0.2061(4) 0.1243(2) 0.0298(6) Uani 1 1 d . . .
C8 C -0.1827(4) -0.2573(5) 0.2019(3) 0.0405(7) Uani 1 1 d . . .
H8A H -0.2106 -0.2990 0.2694 0.049 Uiso 1 1 calc R . .
H8B H -0.2326 -0.1523 0.2101 0.049 Uiso 1 1 calc R . .
C9 C 0.2417(4) 0.1256(4) 0.2993(2) 0.0359(7) Uani 1 1 d D B .
C12 C 0.3992(6) 0.1939(5) 0.3930(3) 0.0601(12) Uani 1 1 d D . .
H12A H 0.5243 0.2170 0.3771 0.072 Uiso 0.70 1 calc PR A 1
H12B H 0.5080 0.2840 0.3813 0.072 Uiso 0.30 1 calc PR A 2
C13A C 0.3474(11) 0.2201(11) 0.5038(5) 0.0750(19) Uiso 0.70 1 d PD B 1
H13A H 0.3905 0.1647 0.5511 0.090 Uiso 0.70 1 calc PR B 1
H13B H 0.2688 0.2933 0.5320 0.090 Uiso 0.70 1 calc PR B 1
C13B C 0.416(3) 0.155(3) 0.4852(11) 0.074(4) Uiso 0.30 1 d PD B 2
H13C H 0.3547 0.2015 0.5495 0.089 Uiso 0.30 1 calc PR B 2
H13D H 0.4893 0.0790 0.4887 0.089 Uiso 0.30 1 calc PR B 2
C10 C 0.1668(6) 0.2901(5) 0.3153(3) 0.0578(11) Uani 1 1 d D . .
H10A H 0.2555 0.4059 0.3720 0.069 Uiso 0.70 1 calc PR B 1
H10B H 0.1703 0.3142 0.2415 0.069 Uiso 0.70 1 calc PR B 1
H10C H 0.2702 0.4023 0.3118 0.069 Uiso 0.30 1 calc PR B 2
H10D H 0.0751 0.2520 0.2490 0.069 Uiso 0.30 1 calc PR B 2
C11A C -0.0181(9) 0.2766(10) 0.3517(8) 0.078(2) Uani 0.70 1 d PD B 1
H11A H -0.0427 0.3942 0.3569 0.093 Uiso 0.70 1 calc PR B 1
H11B H -0.0246 0.2601 0.4269 0.093 Uiso 0.70 1 calc PR B 1
H11C H -0.1105 0.1664 0.2956 0.093 Uiso 0.70 1 calc PR B 1
C11B C 0.078(3) 0.355(3) 0.4222(14) 0.098(6) Uiso 0.30 1 d PD B 2
H11D H 0.0355 0.4590 0.4206 0.118 Uiso 0.30 1 calc PR B 2
H11E H 0.1684 0.3998 0.4893 0.118 Uiso 0.30 1 calc PR B 2
H11F H -0.0272 0.2469 0.4267 0.118 Uiso 0.30 1 calc PR B 2
 
loop_
 _atom_site_aniso_label
 _atom_site_aniso_U_11
 _atom_site_aniso_U_22
 _atom_site_aniso_U_33
 _atom_site_aniso_U_23
 _atom_site_aniso_U_13
 _atom_site_aniso_U_12
O1 0.0514(13) 0.0330(11) 0.0221(9) 0.0140(8) 0.0055(9) -0.0004(9)
O2 0.0300(11) 0.0512(14) 0.0569(14) 0.0424(12) -0.0103(10) -0.0092(9)
O4 0.0320(12) 0.0573(15) 0.0682(17) 0.0493(13) -0.0194(11) -0.0182(10)
O3 0.0306(10) 0.0470(12) 0.0445(12) 0.0352(10) -0.0062(9) -0.0021(9)
C1 0.0269(12) 0.0264(12) 0.0277(13) 0.0163(10) -0.0005(10) 0.0029(10)
C2 0.0351(15) 0.0253(13) 0.0556(19) 0.0188(13) -0.0016(13) 0.0060(11)
C3 0.0363(17) 0.0364(17) 0.091(3) 0.0333(18) -0.0033(17) 0.0138(14)
C4 0.0256(14) 0.0383(16) 0.066(2) 0.0254(15) 0.0071(13) 0.0126(12)
C5 0.0237(12) 0.0241(12) 0.0251(12) 0.0130(10) -0.0018(9) 0.0031(10)
C6 0.0225(12) 0.0295(13) 0.0250(12) 0.0155(10) -0.0015(9) 0.0013(10)
C7 0.0238(12) 0.0328(14) 0.0320(13) 0.0199(11) -0.0017(10) -0.0010(10)
C8 0.0308(15) 0.0475(18) 0.0529(19) 0.0352(15) 0.0104(13) 0.0075(13)
C9 0.0521(18) 0.0245(13) 0.0234(13) 0.0103(10) -0.0005(12) 0.0002(12)
C12 0.073(3) 0.047(2) 0.0351(17) 0.0181(15) -0.0236(17) -0.0171(18)
C10 0.093(3) 0.0326(17) 0.048(2) 0.0108(15) 0.022(2) 0.0238(19)
C11A 0.102(6) 0.062(4) 0.087(5) 0.029(4) 0.037(4) 0.046(4)
 
_geom_special_details
;
 All esds (except the esd in the dihedral angle between two l.s. planes)
 are estimated using the full covariance matrix.  The cell esds are taken
 into account individually in the estimation of esds in distances, angles
 and torsion angles; correlations between esds in cell parameters are only
 used when they are defined by crystal symmetry.  An approximate (isotropic)
 treatment of cell esds is used for estimating esds involving l.s. planes.
;
 
loop_
 _geom_bond_atom_site_label_1
 _geom_bond_atom_site_label_2
 _geom_bond_distance
 _geom_bond_site_symmetry_2
 _geom_bond_publ_flag
O1 C1 1.441(3) . ?
O1 C9 1.445(3) . ?
O2 C8 1.417(4) . ?
O2 H2 0.8400 . ?
O4 C7 1.316(3) . ?
O4 H4 0.8400 . ?
O3 C7 1.206(3) . ?
C1 C8 1.517(4) . ?
C1 C6 1.521(3) . ?
C1 C2 1.533(4) . ?
C2 C3 1.532(4) . ?
C2 H2A 0.9900 . ?
C2 H2B 0.9900 . ?
C3 C4 1.535(5) . ?
C3 H3A 0.9900 . ?
C3 H3B 0.9900 . ?
C4 C5 1.545(4) . ?
C4 H4A 0.9900 . ?
C4 H4B 0.9900 . ?
C5 C7 1.515(3) . ?
C5 C6 1.525(3) . ?
C5 C9 1.560(4) . ?
C6 H6A 0.9900 . ?
C6 H6B 0.9900 . ?
C8 H8A 0.9900 . ?
C8 H8B 0.9900 . ?
C9 C12 1.520(4) . ?
C9 C10 1.528(4) . ?
C12 C13B 1.293(7) . ?
C12 C13A 1.394(6) . ?
C12 H12A 0.9500 . ?
C12 H12B 0.9500 . ?
C13A H13A 0.9500 . ?
C13A H13B 0.9500 . ?
C13B H13C 0.9500 . ?
C13B H13D 0.9500 . ?
C10 C11A 1.468(5) . ?
C10 C11B 1.496(7) . ?
C10 H10A 0.9900 . ?
C10 H10B 0.9900 . ?
C10 H10C 0.9900 . ?
C10 H10D 0.9900 . ?
C11A H11A 0.9800 . ?
C11A H11B 0.9800 . ?
C11A H11C 0.9800 . ?
C11B H11D 0.9800 . ?
C11B H11E 0.9800 . ?
C11B H11F 0.9800 . ?
 
loop_
 _geom_angle_atom_site_label_1
 _geom_angle_atom_site_label_2
 _geom_angle_atom_site_label_3
 _geom_angle
 _geom_angle_site_symmetry_1
 _geom_angle_site_symmetry_3
 _geom_angle_publ_flag
C1 O1 C9 110.59(19) . . ?
C8 O2 H2 109.5 . . ?
C7 O4 H4 109.5 . . ?
O1 C1 C8 106.8(2) . . ?
O1 C1 C6 104.4(2) . . ?
C8 C1 C6 115.1(2) . . ?
O1 C1 C2 108.2(2) . . ?
C8 C1 C2 112.4(2) . . ?
C6 C1 C2 109.5(2) . . ?
C3 C2 C1 109.9(2) . . ?
C3 C2 H2A 109.7 . . ?
C1 C2 H2A 109.7 . . ?
C3 C2 H2B 109.7 . . ?
C1 C2 H2B 109.7 . . ?
H2A C2 H2B 108.2 . . ?
C2 C3 C4 113.6(3) . . ?
C2 C3 H3A 108.8 . . ?
C4 C3 H3A 108.8 . . ?
C2 C3 H3B 108.8 . . ?
C4 C3 H3B 108.8 . . ?
H3A C3 H3B 107.7 . . ?
C3 C4 C5 113.6(3) . . ?
C3 C4 H4A 108.8 . . ?
C5 C4 H4A 108.8 . . ?
C3 C4 H4B 108.8 . . ?
C5 C4 H4B 108.8 . . ?
H4A C4 H4B 107.7 . . ?
C7 C5 C6 112.6(2) . . ?
C7 C5 C4 110.2(2) . . ?
C6 C5 C4 108.4(2) . . ?
C7 C5 C9 112.7(2) . . ?
C6 C5 C9 99.8(2) . . ?
C4 C5 C9 112.8(2) . . ?
C1 C6 C5 99.52(19) . . ?
C1 C6 H6A 111.9 . . ?
C5 C6 H6A 111.9 . . ?
C1 C6 H6B 111.9 . . ?
C5 C6 H6B 111.9 . . ?
H6A C6 H6B 109.6 . . ?
O3 C7 O4 123.1(2) . . ?
O3 C7 C5 123.9(2) . . ?
O4 C7 C5 113.0(2) . . ?
O2 C8 C1 112.5(3) . . ?
O2 C8 H8A 109.1 . . ?
C1 C8 H8A 109.1 . . ?
O2 C8 H8B 109.1 . . ?
C1 C8 H8B 109.1 . . ?
H8A C8 H8B 107.8 . . ?
O1 C9 C12 108.8(2) . . ?
O1 C9 C10 110.3(3) . . ?
C12 C9 C10 107.6(3) . . ?
O1 C9 C5 102.5(2) . . ?
C12 C9 C5 117.0(3) . . ?
C10 C9 C5 110.5(2) . . ?
C13B C12 C13A 35.7(8) . . ?
C13B C12 C9 133.3(9) . . ?
C13A C12 C9 115.3(5) . . ?
C13B C12 H12A 96.8 . . ?
C13A C12 H12A 122.4 . . ?
C9 C12 H12A 122.4 . . ?
C13B C12 H12B 113.3 . . ?
C13A C12 H12B 119.1 . . ?
C9 C12 H12B 113.3 . . ?
H12A C12 H12B 34.5 . . ?
C12 C13A H13A 120.0 . . ?
C12 C13A H13B 120.0 . . ?
H13A C13A H13B 120.0 . . ?
C12 C13B H13C 120.0 . . ?
C12 C13B H13D 120.0 . . ?
H13C C13B H13D 120.0 . . ?
C11A C10 C11B 40.7(9) . . ?
C11A C10 C9 120.9(4) . . ?
C11B C10 C9 118.3(10) . . ?
C11A C10 H10A 107.1 . . ?
C11B C10 H10A 69.8 . . ?
C9 C10 H10A 107.1 . . ?
C11A C10 H10B 107.1 . . ?
C11B C10 H10B 133.6 . . ?
C9 C10 H10B 107.1 . . ?
H10A C10 H10B 106.8 . . ?
C11A C10 H10C 130.3 . . ?
C11B C10 H10C 107.7 . . ?
C9 C10 H10C 107.7 . . ?
H10A C10 H10C 44.3 . . ?
H10B C10 H10C 64.2 . . ?
C11A C10 H10D 68.7 . . ?
C11B C10 H10D 107.7 . . ?
C9 C10 H10D 107.7 . . ?
H10A C10 H10D 140.8 . . ?
H10B C10 H10D 45.2 . . ?
H10C C10 H10D 107.1 . . ?
C10 C11A H11A 109.5 . . ?
C10 C11A H11B 109.5 . . ?
H11A C11A H11B 109.5 . . ?
C10 C11A H11C 109.5 . . ?
H11A C11A H11C 109.5 . . ?
H11B C11A H11C 109.5 . . ?
C10 C11B H11D 109.5 . . ?
C10 C11B H11E 109.5 . . ?
H11D C11B H11E 109.5 . . ?
C10 C11B H11F 109.5 . . ?
H11D C11B H11F 109.5 . . ?
H11E C11B H11F 109.5 . . ?
 
loop_
 _geom_torsion_atom_site_label_1
 _geom_torsion_atom_site_label_2
 _geom_torsion_atom_site_label_3
 _geom_torsion_atom_site_label_4
 _geom_torsion
 _geom_torsion_site_symmetry_1
 _geom_torsion_site_symmetry_2
 _geom_torsion_site_symmetry_3
 _geom_torsion_site_symmetry_4
 _geom_torsion_publ_flag
C9 O1 C1 C8 -137.6(2) . . . . ?
C9 O1 C1 C6 -15.4(3) . . . . ?
C9 O1 C1 C2 101.2(3) . . . . ?
O1 C1 C2 C3 -50.9(3) . . . . ?
C8 C1 C2 C3 -168.6(3) . . . . ?
C6 C1 C2 C3 62.3(3) . . . . ?
C1 C2 C3 C4 -40.8(4) . . . . ?
C2 C3 C4 C5 39.1(4) . . . . ?
C3 C4 C5 C7 -179.7(3) . . . . ?
C3 C4 C5 C6 -56.1(3) . . . . ?
C3 C4 C5 C9 53.5(4) . . . . ?
O1 C1 C6 C5 39.2(3) . . . . ?
C8 C1 C6 C5 155.9(2) . . . . ?
C2 C1 C6 C5 -76.5(3) . . . . ?
C7 C5 C6 C1 -166.5(2) . . . . ?
C4 C5 C6 C1 71.3(3) . . . . ?
C9 C5 C6 C1 -46.8(2) . . . . ?
C6 C5 C7 O3 2.1(4) . . . . ?
C4 C5 C7 O3 123.2(3) . . . . ?
C9 C5 C7 O3 -109.9(3) . . . . ?
C6 C5 C7 O4 -177.0(3) . . . . ?
C4 C5 C7 O4 -55.9(3) . . . . ?
C9 C5 C7 O4 71.0(3) . . . . ?
O1 C1 C8 O2 -174.2(2) . . . . ?
C6 C1 C8 O2 70.5(3) . . . . ?
C2 C1 C8 O2 -55.8(3) . . . . ?
C1 O1 C9 C12 -139.2(3) . . . . ?
C1 O1 C9 C10 103.0(3) . . . . ?
C1 O1 C9 C5 -14.7(3) . . . . ?
C7 C5 C9 O1 158.2(2) . . . . ?
C6 C5 C9 O1 38.4(3) . . . . ?
C4 C5 C9 O1 -76.4(3) . . . . ?
C7 C5 C9 C12 -82.9(3) . . . . ?
C6 C5 C9 C12 157.3(3) . . . . ?
C4 C5 C9 C12 42.5(3) . . . . ?
C7 C5 C9 C10 40.6(3) . . . . ?
C6 C5 C9 C10 -79.1(3) . . . . ?
C4 C5 C9 C10 166.1(3) . . . . ?
O1 C9 C12 C13B -12.4(14) . . . . ?
C10 C9 C12 C13B 107.2(13) . . . . ?
C5 C9 C12 C13B -127.8(13) . . . . ?
O1 C9 C12 C13A -50.2(5) . . . . ?
C10 C9 C12 C13A 69.3(5) . . . . ?
C5 C9 C12 C13A -165.7(5) . . . . ?
O1 C9 C10 C11A 6.9(6) . . . . ?
C12 C9 C10 C11A -111.7(5) . . . . ?
C5 C9 C10 C11A 119.5(5) . . . . ?
O1 C9 C10 C11B 53.9(12) . . . . ?
C12 C9 C10 C11B -64.6(12) . . . . ?
C5 C9 C10 C11B 166.6(12) . . . . ?
 
loop_
 _geom_hbond_atom_site_label_D
 _geom_hbond_atom_site_label_H
 _geom_hbond_atom_site_label_A
 _geom_hbond_distance_DH
 _geom_hbond_distance_HA
 _geom_hbond_distance_DA
 _geom_hbond_angle_DHA
 _geom_hbond_site_symmetry_A
O2 H2 O3  0.84 1.89 2.721(3) 168.3 2
O4 H4 O2  0.84 1.76 2.577(3) 164.4 1_665
 
_diffrn_measured_fraction_theta_max    0.975
_diffrn_reflns_theta_full              27.50
_diffrn_measured_fraction_theta_full   0.975
_refine_diff_density_max    1.057
_refine_diff_density_min   -0.888
_refine_diff_density_rms    0.098

#-end-end-end-end-end-end-end-end-end-end-end-end-end-end-end-end-end-end
#=======================================================================
#  Data block for (21) (one for each study in the paper)
#=======================================================================
data_JD14slowLT(21)
 
_audit_creation_method            SHELXL-97
_chemical_name_systematic
;
 (1R*, 5R*)-7,7-divinyl-5-hydroxymethyl-6-
oxabicyclo[3.2.1]octane-1-carboxylic acid

;
_chemical_name_common             ?
_chemical_melting_point           ?
_chemical_formula_moiety           'C13 H18 O4'
_chemical_formula_sum
 'C13 H18 O4'
_chemical_formula_weight          238.27
 
loop_
 _atom_type_symbol
 _atom_type_description
 _atom_type_scat_dispersion_real
 _atom_type_scat_dispersion_imag
 _atom_type_scat_source
 'C'  'C'   0.0033   0.0016
 'International Tables Vol C Tables 4.2.6.8 and 6.1.1.4'
 'H'  'H'   0.0000   0.0000
 'International Tables Vol C Tables 4.2.6.8 and 6.1.1.4'
 'O'  'O'   0.0106   0.0060
 'International Tables Vol C Tables 4.2.6.8 and 6.1.1.4'
 
_symmetry_cell_setting            Monoclinic
_symmetry_space_group_name_H-M     'P21/c'
loop_
 _symmetry_equiv_pos_as_xyz
 'x, y, z'
 '-x, y+1/2, -z+1/2'
 '-x, -y, -z'
 'x, -y-1/2, z-1/2'
 
_cell_length_a                    8.9310(12)
_cell_length_b                    14.491(3)
_cell_length_c                    12.0300(13)
_cell_angle_alpha                 90.00
_cell_angle_beta                  128.818(7)
_cell_angle_gamma                 90.00
_cell_volume                      1213.1(3)
_cell_formula_units_Z             4
_cell_measurement_temperature     170(2)
_cell_measurement_reflns_used     2878
_cell_measurement_theta_min       2.59
_cell_measurement_theta_max       27.50
 
_computing_cell_refinement 'HKL Denzo and Scalepack (Otwinowski & Minor 1997)'

 
_exptl_crystal_description        'prism'
_exptl_crystal_colour             colourless
_exptl_crystal_size_max           0.45
_exptl_crystal_size_mid           0.40
_exptl_crystal_size_min           0.30
_exptl_crystal_density_meas       ?
_exptl_crystal_density_diffrn     1.305
_exptl_crystal_density_method     'not measured'
_exptl_crystal_F_000              512
_exptl_absorpt_coefficient_mu     0.096
_exptl_absorpt_correction_type    'none'
_exptl_absorpt_correction_T_min   0.9581
_exptl_absorpt_correction_T_max   0.9718
_exptl_absorpt_process_details    ?
 
_exptl_special_details
;
 ?
;
 
_diffrn_ambient_temperature       170(2)
_diffrn_radiation_wavelength      0.71073
_diffrn_radiation_type            MoK\a
_diffrn_radiation_source          'fine-focus sealed tube'
_diffrn_measurement_device_type  'KappaCCD'
_diffrn_measurement_device  '95mm CCD camera on \k-goniostat'
_diffrn_detector_area_resol_mean    9
_diffrn_radiation_monochromator        'horizontally mounted graphite crystal'
_diffrn_measurement_method     '\f and \w'

_diffrn_reflns_number             2788
_diffrn_reflns_av_R_equivalents   0.0000
_diffrn_reflns_av_sigmaI/netI     0.0348
_diffrn_reflns_limit_h_min        0
_diffrn_reflns_limit_h_max        11
_diffrn_reflns_limit_k_min        -18
_diffrn_reflns_limit_k_max        0
_diffrn_reflns_limit_l_min        -15
_diffrn_reflns_limit_l_max        11
_diffrn_reflns_theta_min          2.59
_diffrn_reflns_theta_max          27.50
_reflns_number_total              2788
_reflns_number_gt                 2415
_reflns_threshold_expression      >2sigma(I)

_computing_data_collection 'Collect (Nonius BV, 2000)'
_computing_data_reduction  'HKL Denzo and Scalepak (Otwinowski & Minor, 1997)'
_computing_structure_solution     'SIR97 (Altomare et al., 1999)'
_computing_structure_refinement   'SHELXL-97 (Sheldrick, 1997)'
_computing_molecular_graphics  
  'PLATON (Spek, 2003)'
_computing_publication_material  
'SHELXL-97, WinGX (Farrugia, 1999) and PLATON'

  
_refine_special_details
;
 Refinement of F^2^ against ALL reflections.  The weighted R-factor wR and
 goodness of fit S are based on F^2^, conventional R-factors R are based
 on F, with F set to zero for negative F^2^. The threshold expression of
 F^2^ > 2sigma(F^2^) is used only for calculating R-factors(gt) etc. and is
 not relevant to the choice of reflections for refinement.  R-factors based
 on F^2^ are statistically about twice as large as those based on F, and R-
 factors based on ALL data will be even larger.
;
 
_refine_ls_structure_factor_coef  Fsqd
_refine_ls_matrix_type            full
_refine_ls_weighting_scheme       calc
_refine_ls_weighting_details
 'calc w=1/[\s^2^(Fo^2^)+(0.0620P)^2^+0.7667P] where P=(Fo^2^+2Fc^2^)/3'
_atom_sites_solution_primary      direct
_atom_sites_solution_secondary    difmap
_atom_sites_solution_hydrogens    geom
_refine_ls_hydrogen_treatment     mixed
_refine_ls_extinction_method      SHELXL
_refine_ls_extinction_coef        0.026(5)
_refine_ls_extinction_expression
 'Fc^*^=kFc[1+0.001xFc^2^\l^3^/sin(2\q)]^-1/4^'
_refine_ls_number_reflns          2788
_refine_ls_number_parameters      155
_refine_ls_number_restraints      0
_refine_ls_R_factor_all           0.0607
_refine_ls_R_factor_gt            0.0521
_refine_ls_wR_factor_ref          0.1362
_refine_ls_wR_factor_gt           0.1296
_refine_ls_goodness_of_fit_ref    1.085
_refine_ls_restrained_S_all       1.085
_refine_ls_shift/su_max           0.001
_refine_ls_shift/su_mean          0.000
 
loop_
 _atom_site_label
 _atom_site_type_symbol
 _atom_site_fract_x
 _atom_site_fract_y
 _atom_site_fract_z
 _atom_site_U_iso_or_equiv
 _atom_site_adp_type
 _atom_site_occupancy
 _atom_site_symmetry_multiplicity
 _atom_site_calc_flag
 _atom_site_refinement_flags
 _atom_site_disorder_assembly
 _atom_site_disorder_group
O1 O 0.26592(15) 0.25270(7) 0.56433(11) 0.0158(3) Uani 1 1 d . . .
O2 O -0.01641(16) 0.10104(7) 0.40645(12) 0.0196(3) Uani 1 1 d . . .
H2 H -0.0376 0.1034 0.4653 0.029 Uiso 1 1 calc R . .
O3 O -0.00449(16) 0.37942(8) 0.14070(12) 0.0216(3) Uani 1 1 d . . .
O4 O 0.20585(17) 0.48283(8) 0.30345(13) 0.0265(3) Uani 1 1 d . . .
H4 H 0.1372 0.5196 0.2349 0.040 Uiso 1 1 calc R . .
C1 C 0.2721(2) 0.18469(10) 0.47826(16) 0.0149(3) Uani 1 1 d . . .
C2 C 0.4801(2) 0.16703(11) 0.54046(18) 0.0206(4) Uani 1 1 d . . .
H2A H 0.4821 0.1249 0.4766 0.025 Uiso 1 1 calc R . .
H2B H 0.5493 0.1365 0.6344 0.025 Uiso 1 1 calc R . .
C3 C 0.5835(2) 0.25687(12) 0.55824(18) 0.0233(4) Uani 1 1 d . . .
H3A H 0.6954 0.2419 0.5627 0.028 Uiso 1 1 calc R . .
H3B H 0.6330 0.2856 0.6502 0.028 Uiso 1 1 calc R . .
C4 C 0.4566(2) 0.32746(11) 0.43804(17) 0.0193(3) Uani 1 1 d . . .
H4A H 0.4578 0.3133 0.3581 0.023 Uiso 1 1 calc R . .
H4B H 0.5122 0.3898 0.4739 0.023 Uiso 1 1 calc R . .
C5 C 0.2463(2) 0.32827(10) 0.38150(16) 0.0148(3) Uani 1 1 d . . .
C6 C 0.1638(2) 0.23109(10) 0.33364(16) 0.0154(3) Uani 1 1 d . . .
H6A H 0.0232 0.2302 0.2806 0.018 Uiso 1 1 calc R . .
H6B H 0.1935 0.2026 0.2747 0.018 Uiso 1 1 calc R . .
C7 C 0.1339(2) 0.39846(10) 0.26228(17) 0.0165(3) Uani 1 1 d . . .
C8 C 0.1855(2) 0.09577(10) 0.48133(17) 0.0190(3) Uani 1 1 d . . .
H8A H 0.2111 0.0459 0.4390 0.023 Uiso 1 1 calc R . .
H8B H 0.2501 0.0790 0.5819 0.023 Uiso 1 1 calc R . .
C9 C 0.2298(2) 0.34303(10) 0.50281(17) 0.0168(3) Uani 1 1 d . . .
C10 C 0.3728(3) 0.41171(12) 0.6164(2) 0.0267(4) Uani 1 1 d . . .
H10 H 0.3690 0.4730 0.5868 0.032 Uiso 1 1 calc R . .
C11 C 0.5019(3) 0.39237(15) 0.7532(2) 0.0374(5) Uani 1 1 d . . .
H11A H 0.5099 0.3318 0.7867 0.045 Uiso 1 1 calc R . .
H11B H 0.5870 0.4390 0.8183 0.045 Uiso 1 1 calc R . .
C12 C 0.0317(3) 0.37647(12) 0.4435(2) 0.0246(4) Uani 1 1 d . . .
H12 H -0.0085 0.4343 0.3957 0.030 Uiso 1 1 calc R . .
C13 C -0.0894(3) 0.33310(13) 0.4521(2) 0.0285(4) Uani 1 1 d . . .
H13A H -0.0555 0.2751 0.4990 0.034 Uiso 1 1 calc R . .
H13B H -0.2111 0.3597 0.4115 0.034 Uiso 1 1 calc R . .
 
loop_
 _atom_site_aniso_label
 _atom_site_aniso_U_11
 _atom_site_aniso_U_22
 _atom_site_aniso_U_33
 _atom_site_aniso_U_23
 _atom_site_aniso_U_13
 _atom_site_aniso_U_12
O1 0.0198(6) 0.0133(5) 0.0144(5) -0.0005(4) 0.0108(5) -0.0008(4)
O2 0.0194(6) 0.0189(5) 0.0194(6) -0.0042(4) 0.0116(5) -0.0049(4)
O3 0.0201(6) 0.0235(6) 0.0156(6) 0.0038(4) 0.0085(5) 0.0012(4)
O4 0.0270(7) 0.0179(6) 0.0222(6) 0.0059(5) 0.0095(5) -0.0030(5)
C1 0.0144(7) 0.0150(7) 0.0127(7) -0.0013(6) 0.0073(6) 0.0012(5)
C2 0.0152(7) 0.0241(8) 0.0180(8) 0.0053(6) 0.0082(7) 0.0067(6)
C3 0.0117(7) 0.0309(9) 0.0212(8) 0.0045(7) 0.0074(7) 0.0017(6)
C4 0.0137(7) 0.0254(8) 0.0191(8) 0.0033(6) 0.0103(6) -0.0008(6)
C5 0.0135(7) 0.0157(7) 0.0134(7) 0.0009(5) 0.0075(6) -0.0005(5)
C6 0.0143(7) 0.0150(7) 0.0125(7) 0.0001(5) 0.0063(6) 0.0007(5)
C7 0.0159(7) 0.0180(7) 0.0186(8) 0.0026(6) 0.0122(7) 0.0012(5)
C8 0.0196(8) 0.0143(7) 0.0196(8) 0.0016(6) 0.0105(7) 0.0014(5)
C9 0.0209(8) 0.0130(7) 0.0187(8) -0.0002(6) 0.0135(7) -0.0016(6)
C10 0.0398(10) 0.0196(8) 0.0295(9) -0.0091(7) 0.0260(9) -0.0112(7)
C11 0.0500(12) 0.0374(10) 0.0271(10) -0.0148(8) 0.0253(10) -0.0250(9)
C12 0.0306(9) 0.0202(8) 0.0313(9) 0.0068(7) 0.0234(8) 0.0083(6)
C13 0.0200(8) 0.0337(10) 0.0310(10) 0.0070(7) 0.0156(8) 0.0056(7)
 
_geom_special_details
;
 All esds (except the esd in the dihedral angle between two l.s. planes)
 are estimated using the full covariance matrix.  The cell esds are taken
 into account individually in the estimation of esds in distances, angles
 and torsion angles; correlations between esds in cell parameters are only
 used when they are defined by crystal symmetry.  An approximate (isotropic)
 treatment of cell esds is used for estimating esds involving l.s. planes.
;
 
loop_
 _geom_bond_atom_site_label_1
 _geom_bond_atom_site_label_2
 _geom_bond_distance
 _geom_bond_site_symmetry_2
 _geom_bond_publ_flag
O1 C9 1.4374(18) . ?
O1 C1 1.4554(18) . ?
O2 C8 1.4257(19) . ?
O2 H2 0.8400 . ?
O3 C7 1.2152(19) . ?
O4 C7 1.3243(19) . ?
O4 H4 0.8400 . ?
C1 C8 1.515(2) . ?
C1 C6 1.518(2) . ?
C1 C2 1.528(2) . ?
C2 C3 1.532(2) . ?
C2 H2A 0.9900 . ?
C2 H2B 0.9900 . ?
C3 C4 1.539(2) . ?
C3 H3A 0.9900 . ?
C3 H3B 0.9900 . ?
C4 C5 1.546(2) . ?
C4 H4A 0.9900 . ?
C4 H4B 0.9900 . ?
C5 C7 1.515(2) . ?
C5 C6 1.525(2) . ?
C5 C9 1.571(2) . ?
C6 H6A 0.9900 . ?
C6 H6B 0.9900 . ?
C8 H8A 0.9900 . ?
C8 H8B 0.9900 . ?
C9 C12 1.514(2) . ?
C9 C10 1.517(2) . ?
C10 C11 1.318(3) . ?
C10 H10 0.9500 . ?
C11 H11A 0.9500 . ?
C11 H11B 0.9500 . ?
C12 C13 1.309(2) . ?
C12 H12 0.9500 . ?
C13 H13A 0.9500 . ?
C13 H13B 0.9500 . ?
 
loop_
 _geom_angle_atom_site_label_1
 _geom_angle_atom_site_label_2
 _geom_angle_atom_site_label_3
 _geom_angle
 _geom_angle_site_symmetry_1
 _geom_angle_site_symmetry_3
 _geom_angle_publ_flag
C9 O1 C1 110.29(11) . . ?
C8 O2 H2 109.5 . . ?
C7 O4 H4 109.5 . . ?
O1 C1 C8 108.12(12) . . ?
O1 C1 C6 103.55(11) . . ?
C8 C1 C6 115.87(12) . . ?
O1 C1 C2 109.98(12) . . ?
C8 C1 C2 109.16(12) . . ?
C6 C1 C2 109.94(12) . . ?
C1 C2 C3 111.58(13) . . ?
C1 C2 H2A 109.3 . . ?
C3 C2 H2A 109.3 . . ?
C1 C2 H2B 109.3 . . ?
C3 C2 H2B 109.3 . . ?
H2A C2 H2B 108.0 . . ?
C2 C3 C4 114.16(13) . . ?
C2 C3 H3A 108.7 . . ?
C4 C3 H3A 108.7 . . ?
C2 C3 H3B 108.7 . . ?
C4 C3 H3B 108.7 . . ?
H3A C3 H3B 107.6 . . ?
C3 C4 C5 113.26(12) . . ?
C3 C4 H4A 108.9 . . ?
C5 C4 H4A 108.9 . . ?
C3 C4 H4B 108.9 . . ?
C5 C4 H4B 108.9 . . ?
H4A C4 H4B 107.7 . . ?
C7 C5 C6 112.71(12) . . ?
C7 C5 C4 108.84(12) . . ?
C6 C5 C4 108.98(12) . . ?
C7 C5 C9 113.33(12) . . ?
C6 C5 C9 99.91(11) . . ?
C4 C5 C9 112.83(12) . . ?
C1 C6 C5 99.58(11) . . ?
C1 C6 H6A 111.9 . . ?
C5 C6 H6A 111.9 . . ?
C1 C6 H6B 111.9 . . ?
C5 C6 H6B 111.9 . . ?
H6A C6 H6B 109.6 . . ?
O3 C7 O4 123.28(14) . . ?
O3 C7 C5 123.88(14) . . ?
O4 C7 C5 112.81(13) . . ?
O2 C8 C1 113.69(12) . . ?
O2 C8 H8A 108.8 . . ?
C1 C8 H8A 108.8 . . ?
O2 C8 H8B 108.8 . . ?
C1 C8 H8B 108.8 . . ?
H8A C8 H8B 107.7 . . ?
O1 C9 C12 110.67(12) . . ?
O1 C9 C10 110.08(13) . . ?
C12 C9 C10 106.84(13) . . ?
O1 C9 C5 103.46(11) . . ?
C12 C9 C5 111.63(13) . . ?
C10 C9 C5 114.20(12) . . ?
C11 C10 C9 124.67(16) . . ?
C11 C10 H10 117.7 . . ?
C9 C10 H10 117.7 . . ?
C10 C11 H11A 120.0 . . ?
C10 C11 H11B 120.0 . . ?
H11A C11 H11B 120.0 . . ?
C13 C12 C9 126.02(16) . . ?
C13 C12 H12 117.0 . . ?
C9 C12 H12 117.0 . . ?
C12 C13 H13A 120.0 . . ?
C12 C13 H13B 120.0 . . ?
H13A C13 H13B 120.0 . . ?
 
loop_
 _geom_torsion_atom_site_label_1
 _geom_torsion_atom_site_label_2
 _geom_torsion_atom_site_label_3
 _geom_torsion_atom_site_label_4
 _geom_torsion
 _geom_torsion_site_symmetry_1
 _geom_torsion_site_symmetry_2
 _geom_torsion_site_symmetry_3
 _geom_torsion_site_symmetry_4
 _geom_torsion_publ_flag
C9 O1 C1 C8 -144.52(12) . . . . ?
C9 O1 C1 C6 -21.08(15) . . . . ?
C9 O1 C1 C2 96.37(14) . . . . ?
O1 C1 C2 C3 -54.12(17) . . . . ?
C8 C1 C2 C3 -172.59(13) . . . . ?
C6 C1 C2 C3 59.28(17) . . . . ?
C1 C2 C3 C4 -37.2(2) . . . . ?
C2 C3 C4 C5 36.2(2) . . . . ?
C3 C4 C5 C7 -178.90(13) . . . . ?
C3 C4 C5 C6 -55.61(17) . . . . ?
C3 C4 C5 C9 54.40(17) . . . . ?
O1 C1 C6 C5 42.38(13) . . . . ?
C8 C1 C6 C5 160.57(12) . . . . ?
C2 C1 C6 C5 -75.10(14) . . . . ?
C7 C5 C6 C1 -167.01(12) . . . . ?
C4 C5 C6 C1 72.05(14) . . . . ?
C9 C5 C6 C1 -46.42(13) . . . . ?
C6 C5 C7 O3 -1.5(2) . . . . ?
C4 C5 C7 O3 119.48(16) . . . . ?
C9 C5 C7 O3 -114.11(16) . . . . ?
C6 C5 C7 O4 -179.70(13) . . . . ?
C4 C5 C7 O4 -58.68(17) . . . . ?
C9 C5 C7 O4 67.74(17) . . . . ?
O1 C1 C8 O2 69.22(16) . . . . ?
C6 C1 C8 O2 -46.42(18) . . . . ?
C2 C1 C8 O2 -171.15(13) . . . . ?
C1 O1 C9 C12 110.93(14) . . . . ?
C1 O1 C9 C10 -131.19(13) . . . . ?
C1 O1 C9 C5 -8.76(15) . . . . ?
C7 C5 C9 O1 154.88(12) . . . . ?
C6 C5 C9 O1 34.74(14) . . . . ?
C4 C5 C9 O1 -80.85(14) . . . . ?
C7 C5 C9 C12 35.85(17) . . . . ?
C6 C5 C9 C12 -84.30(14) . . . . ?
C4 C5 C9 C12 160.12(13) . . . . ?
C7 C5 C9 C10 -85.48(17) . . . . ?
C6 C5 C9 C10 154.38(13) . . . . ?
C4 C5 C9 C10 38.80(18) . . . . ?
O1 C9 C10 C11 -4.6(2) . . . . ?
C12 C9 C10 C11 115.7(2) . . . . ?
C5 C9 C10 C11 -120.40(19) . . . . ?
O1 C9 C12 C13 3.4(2) . . . . ?
C10 C9 C12 C13 -116.4(2) . . . . ?
C5 C9 C12 C13 118.1(2) . . . . ?
 
loop_
 _geom_hbond_atom_site_label_D
 _geom_hbond_atom_site_label_H
 _geom_hbond_atom_site_label_A
 _geom_hbond_distance_DH
 _geom_hbond_distance_HA
 _geom_hbond_distance_DA
 _geom_hbond_angle_DHA
 _geom_hbond_site_symmetry_A
O2 H2 O3  0.84 1.95 2.7671(17) 162.4 4_566
O4 H4 O2  0.84 1.77 2.6109(16) 173.5 2
 
_diffrn_measured_fraction_theta_max    0.999
_diffrn_reflns_theta_full              27.50
_diffrn_measured_fraction_theta_full   0.999
_refine_diff_density_max    0.537
_refine_diff_density_min   -0.346
_refine_diff_density_rms    0.068

#-end-end-end-end-end-end-end-end-end-end-end-end-end-end-end-end-end-end
 
#=======================================================================
#  Data block for (32) (one for each study in the paper)
#=======================================================================

data_jd9p(32)
 
_audit_creation_method            SHELXL-97
_chemical_name_systematic
;
 (1R*, 5R*)-7,7-diethylnyl-5-iodomethyl-6-
oxabicyclo[3.2.1]octane-1-carboxylic acid 
;
_chemical_name_common             ?
_chemical_melting_point           ?
_chemical_formula_moiety          'C13 H13 I O3'
_chemical_formula_sum
 'C13 H13 I O3'
_chemical_formula_weight          344.13
 
loop_
 _atom_type_symbol
 _atom_type_description
 _atom_type_scat_dispersion_real
 _atom_type_scat_dispersion_imag
 _atom_type_scat_source
 'C'  'C'   0.0033   0.0016
 'International Tables Vol C Tables 4.2.6.8 and 6.1.1.4'
 'H'  'H'   0.0000   0.0000
 'International Tables Vol C Tables 4.2.6.8 and 6.1.1.4'
 'O'  'O'   0.0106   0.0060
 'International Tables Vol C Tables 4.2.6.8 and 6.1.1.4'
 'I'  'I'  -0.4742   1.8119
 'International Tables Vol C Tables 4.2.6.8 and 6.1.1.4'
 
_symmetry_cell_setting            'Monoclinic'
_symmetry_space_group_name_H-M    'P21/c'
 
loop_
 _symmetry_equiv_pos_as_xyz
 'x, y, z'
 '-x, y+1/2, -z+1/2'
 '-x, -y, -z'
 'x, -y-1/2, z-1/2'
 
_cell_length_a                    8.0850(4)
_cell_length_b                    7.4740(3)
_cell_length_c                    21.7980(11)
_cell_angle_alpha                 90.00
_cell_angle_beta                  91.113(3)
_cell_angle_gamma                 90.00
_cell_volume                      1316.95(11)
_cell_formula_units_Z             4
_cell_measurement_temperature     293(2)
_cell_measurement_reflns_used     2901
_cell_measurement_theta_min       1.87
_cell_measurement_theta_max       27.43
 
_computing_cell_refinement 'HKL Denzo and Scalepack (Otwinowski & Minor 1997)'

_exptl_crystal_description        prism
_exptl_crystal_colour             colourless
_exptl_crystal_size_max           0.75
_exptl_crystal_size_mid           0.38
_exptl_crystal_size_min           0.38
_exptl_crystal_density_meas       ?
_exptl_crystal_density_diffrn     1.736
_exptl_crystal_density_method     'not measured'
_exptl_crystal_F_000              672
_exptl_absorpt_coefficient_mu     2.425
_exptl_absorpt_correction_type    'MULABS(Blessing, 1995)'
_exptl_absorpt_correction_T_min   0.2635
_exptl_absorpt_correction_T_max   0.4592
_exptl_absorpt_process_details    ?
 
_exptl_special_details
;
 ?
;
 
_diffrn_ambient_temperature       293(2)
_diffrn_radiation_wavelength      0.71073
_diffrn_radiation_type            MoK\a
_diffrn_radiation_source          'fine-focus sealed tube'
_diffrn_measurement_device_type  'KappaCCD'
_diffrn_measurement_device  '95mm CCD camera on \k-goniostat'
_diffrn_detector_area_resol_mean    9
_diffrn_radiation_monochromator        'horizontally mounted graphite crystal'
_diffrn_measurement_method     '\f and \w'
_diffrn_reflns_number             9652
_diffrn_reflns_av_R_equivalents   0.0472
_diffrn_reflns_av_sigmaI/netI     0.0385
_diffrn_reflns_limit_h_min        -8
_diffrn_reflns_limit_h_max        10
_diffrn_reflns_limit_k_min        -9
_diffrn_reflns_limit_k_max        9
_diffrn_reflns_limit_l_min        -25
_diffrn_reflns_limit_l_max        28
_diffrn_reflns_theta_min          1.87
_diffrn_reflns_theta_max          27.43
_reflns_number_total              2901
_reflns_number_gt                 2536
_reflns_threshold_expression      >2sigma(I)
 
_computing_data_collection 'Collect (Nonius BV, 2000)'
_computing_data_reduction  'HKL Denzo and Scalepak (Otwinowski & Minor, 1997)'
_computing_structure_solution     'SIR97 (Altomare et al., 1999)'
_computing_structure_refinement   'SHELXL-97 (Sheldrick, 1997)'
_computing_molecular_graphics  
  'PLATON (Spek, 2003)'
_computing_publication_material  
'SHELXL-97, WinGX (Farrugia, 1999) and PLATON'

  
_refine_special_details
;
 Refinement of F^2^ against ALL reflections.  The weighted R-factor wR and
 goodness of fit S are based on F^2^, conventional R-factors R are based
 on F, with F set to zero for negative F^2^. The threshold expression of
 F^2^ > 2sigma(F^2^) is used only for calculating R-factors(gt) etc. and is
 not relevant to the choice of reflections for refinement.  R-factors based
 on F^2^ are statistically about twice as large as those based on F, and R-
 factors based on ALL data will be even larger.
;
 
_refine_ls_structure_factor_coef  Fsqd
_refine_ls_matrix_type            full
_refine_ls_weighting_scheme       calc
_refine_ls_weighting_details
 'calc w=1/[\s^2^(Fo^2^)+(0.0936P)^2^+6.0882P] where P=(Fo^2^+2Fc^2^)/3'
_atom_sites_solution_primary      direct
_atom_sites_solution_secondary    difmap
_atom_sites_solution_hydrogens    geom
_refine_ls_hydrogen_treatment     mixed
_refine_ls_extinction_method      none
_refine_ls_extinction_coef        ?
_refine_ls_number_reflns          2901
_refine_ls_number_parameters      155
_refine_ls_number_restraints      0
_refine_ls_R_factor_all           0.0880
_refine_ls_R_factor_gt            0.0770
_refine_ls_wR_factor_ref          0.2160
_refine_ls_wR_factor_gt           0.2018
_refine_ls_goodness_of_fit_ref    1.080
_refine_ls_restrained_S_all       1.080
_refine_ls_shift/su_max           0.002
_refine_ls_shift/su_mean          0.000
 
loop_
 _atom_site_label
 _atom_site_type_symbol
 _atom_site_fract_x
 _atom_site_fract_y
 _atom_site_fract_z
 _atom_site_U_iso_or_equiv
 _atom_site_adp_type
 _atom_site_occupancy
 _atom_site_symmetry_multiplicity
 _atom_site_calc_flag
 _atom_site_refinement_flags
 _atom_site_disorder_assembly
 _atom_site_disorder_group
I1 I 0.16884(7) 0.51914(9) 0.42466(3) 0.0794(3) Uani 1 1 d . . .
O1 O -0.0762(5) 0.2591(6) 0.32708(16) 0.0439(10) Uani 1 1 d . . .
O3 O -0.3011(5) 0.0527(7) 0.49510(18) 0.0500(11) Uani 1 1 d . . .
O4 O -0.4724(6) -0.0292(7) 0.41898(19) 0.0536(12) Uani 1 1 d . . .
H4 H -0.5430 -0.0136 0.4449 0.080 Uiso 1 1 calc R . .
C1 C 0.0534(6) 0.1663(9) 0.3616(2) 0.0393(12) Uani 1 1 d . . .
C2 C 0.1059(9) -0.0012(10) 0.3257(3) 0.0543(17) Uani 1 1 d . . .
H2A H 0.1639 0.0328 0.2897 0.065 Uiso 1 1 d R . .
H2B H 0.1779 -0.0732 0.3517 0.065 Uiso 1 1 d R . .
C3 C -0.0441(9) -0.1127(11) 0.3077(3) 0.0581(17) Uani 1 1 d . . .
H3A H -0.0981 -0.0537 0.2737 0.070 Uiso 1 1 d R . .
H3B H -0.0101 -0.2307 0.2957 0.070 Uiso 1 1 d R . .
C4 C -0.1717(8) -0.1300(9) 0.3579(3) 0.0466(13) Uani 1 1 d . . .
H4A H -0.2757 -0.1700 0.3399 0.056 Uiso 1 1 d R . .
H4B H -0.1317 -0.2180 0.3859 0.056 Uiso 1 1 d R . .
C5 C -0.1973(6) 0.0468(8) 0.3930(2) 0.0333(11) Uani 1 1 d . . .
C6 C -0.0327(6) 0.1084(8) 0.4196(2) 0.0363(11) Uani 1 1 d . . .
H6A H 0.0243 0.0114 0.4396 0.044 Uiso 1 1 d R . .
H6B H -0.0457 0.2054 0.4476 0.044 Uiso 1 1 d R . .
C7 C -0.3296(6) 0.0246(7) 0.4404(2) 0.0336(11) Uani 1 1 d . . .
C8 C 0.1994(7) 0.2899(10) 0.3674(3) 0.0516(15) Uani 1 1 d . . .
H8A H 0.2254 0.3319 0.3274 0.062 Uiso 1 1 d R . .
H8B H 0.2904 0.2219 0.3844 0.062 Uiso 1 1 d R . .
C9 C -0.2369(6) 0.2062(8) 0.3481(2) 0.0369(12) Uani 1 1 d . . .
C10 C -0.3440(7) 0.1566(10) 0.2947(3) 0.0470(14) Uani 1 1 d . . .
C11 C -0.4299(10) 0.1236(14) 0.2532(3) 0.070(2) Uani 1 1 d . . .
H11 H -0.4999 0.0966 0.2182 0.083 Uiso 1 1 d R . .
C12 C -0.3129(7) 0.3560(9) 0.3807(3) 0.0431(13) Uani 1 1 d . . .
C13 C -0.3730(10) 0.4735(10) 0.4075(4) 0.0621(19) Uani 1 1 d . . .
H13 H -0.4230 0.5675 0.4305 0.075 Uiso 1 1 d R . .
 
loop_
 _atom_site_aniso_label
 _atom_site_aniso_U_11
 _atom_site_aniso_U_22
 _atom_site_aniso_U_33
 _atom_site_aniso_U_23
 _atom_site_aniso_U_13
 _atom_site_aniso_U_12
I1 0.0466(4) 0.0761(5) 0.1158(6) -0.0167(3) 0.0092(3) -0.0061(2)
O1 0.0291(18) 0.071(3) 0.0321(18) 0.0202(18) 0.0041(14) -0.0041(18)
O3 0.033(2) 0.087(3) 0.0299(19) 0.005(2) 0.0073(15) -0.002(2)
O4 0.032(2) 0.093(4) 0.036(2) 0.000(2) 0.0081(16) -0.016(2)
C1 0.026(2) 0.063(3) 0.029(2) 0.005(2) 0.0039(18) 0.001(2)
C2 0.041(3) 0.079(5) 0.044(3) -0.002(3) 0.017(3) 0.007(3)
C3 0.052(4) 0.077(5) 0.046(3) -0.014(3) 0.015(3) 0.005(3)
C4 0.039(3) 0.053(3) 0.048(3) -0.006(3) 0.008(2) 0.003(3)
C5 0.025(2) 0.050(3) 0.025(2) 0.006(2) 0.0051(17) 0.002(2)
C6 0.024(2) 0.056(3) 0.029(2) 0.006(2) 0.0036(18) 0.004(2)
C7 0.027(2) 0.046(3) 0.029(2) 0.009(2) 0.0041(18) 0.001(2)
C8 0.028(3) 0.076(4) 0.052(3) 0.010(3) 0.009(2) -0.003(3)
C9 0.025(2) 0.057(3) 0.029(2) 0.012(2) 0.0011(18) -0.003(2)
C10 0.038(3) 0.069(4) 0.034(3) 0.008(3) -0.002(2) -0.002(3)
C11 0.057(4) 0.108(7) 0.043(3) -0.001(4) -0.014(3) 0.000(4)
C12 0.029(3) 0.051(3) 0.049(3) 0.011(3) -0.001(2) -0.002(2)
C13 0.045(4) 0.058(4) 0.083(5) -0.005(4) 0.005(4) -0.003(3)
 
_geom_special_details
;
 All esds (except the esd in the dihedral angle between two l.s. planes)
 are estimated using the full covariance matrix.  The cell esds are taken
 into account individually in the estimation of esds in distances, angles
 and torsion angles; correlations between esds in cell parameters are only
 used when they are defined by crystal symmetry.  An approximate (isotropic)
 treatment of cell esds is used for estimating esds involving l.s. planes.
;
 
loop_
 _geom_bond_atom_site_label_1
 _geom_bond_atom_site_label_2
 _geom_bond_distance
 _geom_bond_site_symmetry_2
 _geom_bond_publ_flag
I1 C8 2.136(7) . ?
O1 C9 1.441(6) . ?
O1 C1 1.454(6) . ?
O3 C7 1.228(7) . ?
O4 C7 1.301(7) . ?
O4 H4 0.8200 . ?
C1 C8 1.502(8) . ?
C1 C6 1.519(7) . ?
C1 C2 1.540(9) . ?
C2 C3 1.517(11) . ?
C2 H2A 0.9563 . ?
C2 H2B 0.9679 . ?
C3 C4 1.525(8) . ?
C3 H3A 0.9601 . ?
C3 H3B 0.9616 . ?
C4 C5 1.543(8) . ?
C4 H4A 0.9683 . ?
C4 H4B 0.9497 . ?
C5 C7 1.510(7) . ?
C5 C6 1.512(7) . ?
C5 C9 1.572(7) . ?
C6 H6A 0.9593 . ?
C6 H6B 0.9548 . ?
C8 H8A 0.9540 . ?
C8 H8B 0.9625 . ?
C9 C12 1.467(9) . ?
C9 C10 1.484(8) . ?
C10 C11 1.156(9) . ?
C11 H11 0.9624 . ?
C12 C13 1.166(10) . ?
C13 H13 0.9572 . ?
 
loop_
 _geom_angle_atom_site_label_1
 _geom_angle_atom_site_label_2
 _geom_angle_atom_site_label_3
 _geom_angle
 _geom_angle_site_symmetry_1
 _geom_angle_site_symmetry_3
 _geom_angle_publ_flag
C9 O1 C1 110.5(4) . . ?
C7 O4 H4 109.5 . . ?
O1 C1 C8 107.9(5) . . ?
O1 C1 C6 103.3(4) . . ?
C8 C1 C6 118.4(5) . . ?
O1 C1 C2 109.2(5) . . ?
C8 C1 C2 108.6(5) . . ?
C6 C1 C2 109.1(5) . . ?
C3 C2 C1 110.6(5) . . ?
C3 C2 H2A 109.6 . . ?
C1 C2 H2A 110.2 . . ?
C3 C2 H2B 108.3 . . ?
C1 C2 H2B 108.9 . . ?
H2A C2 H2B 109.2 . . ?
C2 C3 C4 114.1(5) . . ?
C2 C3 H3A 107.3 . . ?
C4 C3 H3A 106.8 . . ?
C2 C3 H3B 110.1 . . ?
C4 C3 H3B 108.6 . . ?
H3A C3 H3B 109.8 . . ?
C3 C4 C5 112.5(5) . . ?
C3 C4 H4A 109.2 . . ?
C5 C4 H4A 110.0 . . ?
C3 C4 H4B 107.1 . . ?
C5 C4 H4B 108.8 . . ?
H4A C4 H4B 109.2 . . ?
C7 C5 C6 113.6(4) . . ?
C7 C5 C4 110.4(5) . . ?
C6 C5 C4 109.0(4) . . ?
C7 C5 C9 111.8(4) . . ?
C6 C5 C9 100.1(4) . . ?
C4 C5 C9 111.6(4) . . ?
C5 C6 C1 100.5(4) . . ?
C5 C6 H6A 110.8 . . ?
C1 C6 H6A 111.7 . . ?
C5 C6 H6B 111.7 . . ?
C1 C6 H6B 112.0 . . ?
H6A C6 H6B 109.9 . . ?
O3 C7 O4 123.3(5) . . ?
O3 C7 C5 121.6(5) . . ?
O4 C7 C5 115.1(5) . . ?
C1 C8 I1 116.3(4) . . ?
C1 C8 H8A 108.1 . . ?
I1 C8 H8A 107.4 . . ?
C1 C8 H8B 107.6 . . ?
I1 C8 H8B 107.1 . . ?
H8A C8 H8B 110.2 . . ?
O1 C9 C12 109.4(5) . . ?
O1 C9 C10 109.6(4) . . ?
C12 C9 C10 109.1(5) . . ?
O1 C9 C5 103.4(4) . . ?
C12 C9 C5 111.0(4) . . ?
C10 C9 C5 114.1(5) . . ?
C11 C10 C9 177.7(8) . . ?
C10 C11 H11 179.0 . . ?
C13 C12 C9 178.9(7) . . ?
C12 C13 H13 178.2 . . ?
 
loop_
 _geom_torsion_atom_site_label_1
 _geom_torsion_atom_site_label_2
 _geom_torsion_atom_site_label_3
 _geom_torsion_atom_site_label_4
 _geom_torsion
 _geom_torsion_site_symmetry_1
 _geom_torsion_site_symmetry_2
 _geom_torsion_site_symmetry_3
 _geom_torsion_site_symmetry_4
 _geom_torsion_publ_flag
C9 O1 C1 C8 -146.8(5) . . . . ?
C9 O1 C1 C6 -20.6(6) . . . . ?
C9 O1 C1 C2 95.3(5) . . . . ?
O1 C1 C2 C3 -51.4(7) . . . . ?
C8 C1 C2 C3 -168.9(6) . . . . ?
C6 C1 C2 C3 60.7(7) . . . . ?
C1 C2 C3 C4 -41.8(9) . . . . ?
C2 C3 C4 C5 40.4(8) . . . . ?
C3 C4 C5 C7 177.7(5) . . . . ?
C3 C4 C5 C6 -56.9(6) . . . . ?
C3 C4 C5 C9 52.7(6) . . . . ?
C7 C5 C6 C1 -165.0(5) . . . . ?
C4 C5 C6 C1 71.4(5) . . . . ?
C9 C5 C6 C1 -45.7(5) . . . . ?
O1 C1 C6 C5 41.7(6) . . . . ?
C8 C1 C6 C5 160.9(5) . . . . ?
C2 C1 C6 C5 -74.3(6) . . . . ?
C6 C5 C7 O3 -1.0(8) . . . . ?
C4 C5 C7 O3 121.8(6) . . . . ?
C9 C5 C7 O3 -113.4(6) . . . . ?
C6 C5 C7 O4 -179.7(5) . . . . ?
C4 C5 C7 O4 -56.9(6) . . . . ?
C9 C5 C7 O4 67.9(6) . . . . ?
O1 C1 C8 I1 68.9(5) . . . . ?
C6 C1 C8 I1 -47.8(7) . . . . ?
C2 C1 C8 I1 -172.9(4) . . . . ?
C1 O1 C9 C12 109.9(5) . . . . ?
C1 O1 C9 C10 -130.5(5) . . . . ?
C1 O1 C9 C5 -8.4(6) . . . . ?
C7 C5 C9 O1 154.6(4) . . . . ?
C6 C5 C9 O1 34.0(5) . . . . ?
C4 C5 C9 O1 -81.2(5) . . . . ?
C7 C5 C9 C12 37.4(6) . . . . ?
C6 C5 C9 C12 -83.3(5) . . . . ?
C4 C5 C9 C12 161.5(4) . . . . ?
C7 C5 C9 C10 -86.4(6) . . . . ?
C6 C5 C9 C10 152.9(5) . . . . ?
C4 C5 C9 C10 37.7(6) . . . . ?
O1 C9 C10 C11 -102(18) . . . . ?
C12 C9 C10 C11 18(18) . . . . ?
C5 C9 C10 C11 142(18) . . . . ?
O1 C9 C12 C13 -112(37) . . . . ?
C10 C9 C12 C13 128(37) . . . . ?
C5 C9 C12 C13 1(37) . . . . ?
 
loop_
 _geom_hbond_atom_site_label_D
 _geom_hbond_atom_site_label_H
 _geom_hbond_atom_site_label_A
 _geom_hbond_distance_DH
 _geom_hbond_distance_HA
 _geom_hbond_distance_DA
 _geom_hbond_angle_DHA
 _geom_hbond_site_symmetry_A
O4 H4 O3  0.82 1.86 2.650(6) 162.8 3_456
C13 H13 I1  0.96 3.32 3.746(8) 109.3 1_455
 
_diffrn_measured_fraction_theta_max    0.967
_diffrn_reflns_theta_full              27.43
_diffrn_measured_fraction_theta_full   0.967
_refine_diff_density_max    1.373
_refine_diff_density_min   -1.585
_refine_diff_density_rms    0.149

#-end-end-end-end-end-end-end-end-end-end-end-end-end-end-end-end-end-end
 
#=======================================================================
#  Data block for (39) (one for each study in the paper)
#=======================================================================

data_sn1rt(39)
 
_audit_creation_method            SHELXL-97
_chemical_name_systematic
;
 (1R*, 5R*, 7S*)-7-ethyl-5-iodomethyl-7-vinyl-6-
oxabicyclo[3.2.1]octane-1-carboxylic acid

;
_chemical_name_common             ?
_chemical_melting_point           ?
_chemical_formula_moiety          'C13 H19 I O3'
_chemical_formula_sum
 'C13 H19 I O3'
_chemical_formula_weight          350.18
 
loop_
 _atom_type_symbol
 _atom_type_description
 _atom_type_scat_dispersion_real
 _atom_type_scat_dispersion_imag
 _atom_type_scat_source
 'C'  'C'   0.0033   0.0000
 'International Tables Vol C Tables 4.2.6.8 and 6.1.1.4'
 'H'  'H'   0.0000   0.0000
 'International Tables Vol C Tables 4.2.6.8 and 6.1.1.4'
 'I'  'I'  -0.4742   0.0000
 'International Tables Vol C Tables 4.2.6.8 and 6.1.1.4'
 'O'  'O'   0.0106   0.0000
 'International Tables Vol C Tables 4.2.6.8 and 6.1.1.4'
 
_symmetry_cell_setting            'Monoclinic'
_symmetry_space_group_name_H-M    'P21/n'
 
loop_
 _symmetry_equiv_pos_as_xyz
 'x, y, z'
 '-x+1/2, y+1/2, -z+1/2'
 '-x, -y, -z'
 'x-1/2, -y-1/2, z-1/2'
 
_cell_length_a                    8.422(2)
_cell_length_b                    12.714(2)
_cell_length_c                    13.419(4)
_cell_angle_alpha                 90.00
_cell_angle_beta                  100.566(15)
_cell_angle_gamma                 90.00
_cell_volume                      1412.5(6)
_cell_formula_units_Z             4
_cell_measurement_temperature     293(2)
_cell_measurement_reflns_used     1246
_cell_measurement_theta_min       2.2
_cell_measurement_theta_max       27.49
 
_computing_cell_refinement 'HKL Denzo and Scalepack (Otwinowski & Minor 1997)'

 
_exptl_crystal_description        'irregular-octahedral'
_exptl_crystal_colour             colourless
_exptl_crystal_size_max           0.40
_exptl_crystal_size_mid           0.35
_exptl_crystal_size_min           0.35
_exptl_crystal_density_meas       ?
_exptl_crystal_density_diffrn     1.647
_exptl_crystal_density_method     'not measured'
_exptl_crystal_F_000              696
_exptl_absorpt_coefficient_mu     2.262
_exptl_absorpt_correction_type    'MULABS(Blessing, 1995)'
_exptl_absorpt_correction_T_min   0.4648
_exptl_absorpt_correction_T_max   0.5048
_exptl_absorpt_process_details    ?
 
_exptl_special_details
;
 ?
;
 
_diffrn_ambient_temperature       293(2)
_diffrn_radiation_wavelength      0.71073
_diffrn_radiation_type            MoK\a
_diffrn_radiation_source          'fine-focus sealed tube'
_diffrn_measurement_device_type  'KappaCCD'
_diffrn_measurement_device  '95mm CCD camera on \k-goniostat'
_diffrn_detector_area_resol_mean    9
_diffrn_radiation_monochromator        'horizontally mounted graphite crystal'
_diffrn_measurement_method     '\f and \w'
 

_diffrn_reflns_number             6988
_diffrn_reflns_av_R_equivalents   0.0430
_diffrn_reflns_av_sigmaI/netI     0.0678
_diffrn_reflns_limit_h_min        -10
_diffrn_reflns_limit_h_max        9
_diffrn_reflns_limit_k_min        -16
_diffrn_reflns_limit_k_max        15
_diffrn_reflns_limit_l_min        -11
_diffrn_reflns_limit_l_max        17
_diffrn_reflns_theta_min          2.22
_diffrn_reflns_theta_max          27.49
_reflns_number_total              3147
_reflns_number_gt                 2709
_reflns_threshold_expression      >2sigma(I)
 
_computing_data_collection 'Collect (Nonius BV, 2000)'
_computing_data_reduction  'HKL Denzo and Scalepak (Otwinowski & Minor, 1997)'
_computing_structure_solution     'SIR97 (Altomare et al., 1999)'
_computing_structure_refinement   'SHELXL-97 (Sheldrick, 1997)'
_computing_molecular_graphics  
  'PLATON (Spek, 2003)'
_computing_publication_material  
'SHELXL-97, WinGX (Farrugia, 1999) and PLATON'

  
_refine_special_details
;
 Refinement of F^2^ against ALL reflections.  The weighted R-factor wR and
 goodness of fit S are based on F^2^, conventional R-factors R are based
 on F, with F set to zero for negative F^2^. The threshold expression of
 F^2^ > 2sigma(F^2^) is used only for calculating R-factors(gt) etc. and is
 not relevant to the choice of reflections for refinement.  R-factors based
 on F^2^ are statistically about twice as large as those based on F, and R-
 factors based on ALL data will be even larger.
;
 
_refine_ls_structure_factor_coef  Fsqd
_refine_ls_matrix_type            full
_refine_ls_weighting_scheme       calc
_refine_ls_weighting_details
 'calc w=1/[\s^2^(Fo^2^)+(0.0462P)^2^+1.9170P] where P=(Fo^2^+2Fc^2^)/3'
_atom_sites_solution_primary      direct
_atom_sites_solution_secondary    difmap
_atom_sites_solution_hydrogens    geom
_refine_ls_hydrogen_treatment     mixed
_refine_ls_extinction_method      SHELXL
_refine_ls_extinction_coef        0.018(3)
_refine_ls_extinction_expression
 'Fc^*^=kFc[1+0.001xFc^2^\l^3^/sin(2\q)]^-1/4^'
_refine_ls_number_reflns          3147
_refine_ls_number_parameters      156
_refine_ls_number_restraints      0
_refine_ls_R_factor_all           0.0563
_refine_ls_R_factor_gt            0.0472
_refine_ls_wR_factor_ref          0.1286
_refine_ls_wR_factor_gt           0.1218
_refine_ls_goodness_of_fit_ref    0.989
_refine_ls_restrained_S_all       0.989
_refine_ls_shift/su_max           0.001
_refine_ls_shift/su_mean          0.000
 
loop_
 _atom_site_label
 _atom_site_type_symbol
 _atom_site_fract_x
 _atom_site_fract_y
 _atom_site_fract_z
 _atom_site_U_iso_or_equiv
 _atom_site_adp_type
 _atom_site_occupancy
 _atom_site_symmetry_multiplicity
 _atom_site_calc_flag
 _atom_site_refinement_flags
 _atom_site_disorder_assembly
 _atom_site_disorder_group
I1 I 0.19075(4) 0.48542(3) 0.35789(3) 0.0687(2) Uani 1 1 d . . .
O1 O 0.4233(3) 0.33214(18) 0.53493(18) 0.0430(5) Uani 1 1 d . . .
O4 O 0.2045(4) 0.0249(2) 0.5723(3) 0.0649(9) Uani 1 1 d . . .
H4 H 0.1357 -0.0215 0.5625 0.078 Uiso 1 1 calc R . .
O3 O -0.0010(3) 0.1260(2) 0.4992(2) 0.0585(8) Uani 1 1 d . . .
C1 C 0.2951(4) 0.3880(3) 0.5716(3) 0.0481(8) Uani 1 1 d . . .
C2 C 0.3442(5) 0.4048(4) 0.6864(3) 0.0633(11) Uani 1 1 d . . .
H2A H 0.4329 0.4545 0.6999 0.076 Uiso 1 1 calc R . .
H2B H 0.2539 0.4342 0.7128 0.076 Uiso 1 1 calc R . .
C3 C 0.3951(6) 0.3016(4) 0.7396(3) 0.0673(12) Uani 1 1 d . . .
H3A H 0.3921 0.3096 0.8111 0.081 Uiso 1 1 calc R . .
H3B H 0.5061 0.2872 0.7337 0.081 Uiso 1 1 calc R . .
C4 C 0.2911(5) 0.2067(4) 0.6989(3) 0.0578(10) Uani 1 1 d . . .
H4A H 0.1951 0.2055 0.7293 0.069 Uiso 1 1 calc R . .
H4B H 0.3512 0.1426 0.7185 0.069 Uiso 1 1 calc R . .
C5 C 0.2405(4) 0.2096(3) 0.5830(3) 0.0405(7) Uani 1 1 d . . .
C6 C 0.1532(4) 0.3131(3) 0.5527(3) 0.0440(8) Uani 1 1 d . . .
H6A H 0.1003 0.3130 0.4821 0.053 Uiso 1 1 calc R . .
H6B H 0.0748 0.3291 0.5952 0.053 Uiso 1 1 calc R . .
C7 C 0.1366(4) 0.1163(3) 0.5468(3) 0.0427(7) Uani 1 1 d . . .
C8 C 0.2707(6) 0.4937(3) 0.5185(4) 0.0596(11) Uani 1 1 d . . .
H8A H 0.3719 0.5321 0.5321 0.072 Uiso 1 1 calc R . .
H8B H 0.1922 0.5336 0.5475 0.072 Uiso 1 1 calc R . .
C9 C 0.3883(4) 0.2208(3) 0.5275(2) 0.0379(7) Uani 1 1 d . . .
C12 C 0.5328(4) 0.1570(3) 0.5754(3) 0.0492(8) Uani 1 1 d . . .
H12 H 0.5148 0.0858 0.5849 0.059 Uiso 1 1 calc R . .
C13 C 0.6797(5) 0.1899(4) 0.6051(4) 0.0660(11) Uani 1 1 d . . .
H13A H 0.7047 0.2604 0.5975 0.079 Uiso 1 1 calc R . .
H13B H 0.7599 0.1431 0.6340 0.079 Uiso 1 1 calc R . .
C10 C 0.3444(5) 0.1900(3) 0.4144(3) 0.0450(8) Uani 1 1 d . . .
H10A H 0.3267 0.1146 0.4093 0.054 Uiso 1 1 calc R . .
H10B H 0.2441 0.2244 0.3845 0.054 Uiso 1 1 calc R . .
C11 C 0.4740(6) 0.2198(4) 0.3546(3) 0.0645(11) Uani 1 1 d . . .
H11A H 0.4406 0.1989 0.2852 0.097 Uiso 1 1 calc R . .
H11B H 0.5731 0.1847 0.3828 0.097 Uiso 1 1 calc R . .
H11C H 0.4904 0.2945 0.3580 0.097 Uiso 1 1 calc R . .
 
loop_
 _atom_site_aniso_label
 _atom_site_aniso_U_11
 _atom_site_aniso_U_22
 _atom_site_aniso_U_33
 _atom_site_aniso_U_23
 _atom_site_aniso_U_13
 _atom_site_aniso_U_12
I1 0.0687(3) 0.0528(2) 0.0813(3) 0.01111(13) 0.00520(17) -0.00240(12)
O1 0.0363(12) 0.0412(12) 0.0528(14) -0.0106(10) 0.0117(10) -0.0060(9)
O4 0.0505(17) 0.0467(16) 0.089(2) 0.0118(15) -0.0096(15) -0.0062(13)
O3 0.0423(15) 0.0481(15) 0.080(2) 0.0098(13) -0.0016(14) -0.0091(11)
C1 0.0398(18) 0.050(2) 0.057(2) -0.0148(16) 0.0129(15) -0.0030(15)
C2 0.058(2) 0.072(3) 0.061(2) -0.031(2) 0.0131(19) -0.006(2)
C3 0.063(3) 0.095(4) 0.042(2) -0.024(2) 0.0040(18) 0.001(2)
C4 0.054(2) 0.082(3) 0.040(2) -0.0014(18) 0.0137(16) 0.002(2)
C5 0.0333(16) 0.0484(18) 0.0414(17) -0.0050(14) 0.0107(13) -0.0025(14)
C6 0.0330(17) 0.0480(19) 0.0521(19) -0.0084(15) 0.0111(14) -0.0027(14)
C7 0.0378(17) 0.0472(18) 0.0445(18) 0.0063(14) 0.0109(14) -0.0048(14)
C8 0.051(2) 0.042(2) 0.087(3) -0.0177(19) 0.013(2) -0.0050(16)
C9 0.0326(15) 0.0407(16) 0.0414(17) -0.0060(13) 0.0091(13) -0.0033(13)
C12 0.0428(19) 0.051(2) 0.056(2) -0.0018(16) 0.0138(16) 0.0031(16)
C13 0.044(2) 0.073(3) 0.078(3) -0.001(2) 0.004(2) 0.003(2)
C10 0.050(2) 0.0466(18) 0.0394(18) -0.0083(14) 0.0102(15) -0.0070(15)
C11 0.069(3) 0.077(3) 0.053(2) -0.010(2) 0.027(2) -0.008(2)
 
_geom_special_details
;
 All esds (except the esd in the dihedral angle between two l.s. planes)
 are estimated using the full covariance matrix.  The cell esds are taken
 into account individually in the estimation of esds in distances, angles
 and torsion angles; correlations between esds in cell parameters are only
 used when they are defined by crystal symmetry.  An approximate (isotropic)
 treatment of cell esds is used for estimating esds involving l.s. planes.
;
 
loop_
 _geom_bond_atom_site_label_1
 _geom_bond_atom_site_label_2
 _geom_bond_distance
 _geom_bond_site_symmetry_2
 _geom_bond_publ_flag
I1 C8 2.139(5) . ?
O1 C9 1.446(4) . ?
O1 C1 1.452(4) . ?
O4 C7 1.312(4) . ?
O4 H4 0.8200 . ?
O3 C7 1.222(4) . ?
C1 C6 1.513(5) . ?
C1 C8 1.517(6) . ?
C1 C2 1.536(6) . ?
C2 C3 1.518(7) . ?
C2 H2A 0.9700 . ?
C2 H2B 0.9700 . ?
C3 C4 1.532(6) . ?
C3 H3A 0.9700 . ?
C3 H3B 0.9700 . ?
C4 C5 1.536(5) . ?
C4 H4A 0.9700 . ?
C4 H4B 0.9700 . ?
C5 C7 1.501(5) . ?
C5 C6 1.526(5) . ?
C5 C9 1.570(4) . ?
C6 H6A 0.9700 . ?
C6 H6B 0.9700 . ?
C8 H8A 0.9700 . ?
C8 H8B 0.9700 . ?
C9 C12 1.505(5) . ?
C9 C10 1.545(4) . ?
C12 C13 1.297(6) . ?
C12 H12 0.9300 . ?
C13 H13A 0.9300 . ?
C13 H13B 0.9300 . ?
C10 C11 1.517(5) . ?
C10 H10A 0.9700 . ?
C10 H10B 0.9700 . ?
C11 H11A 0.9600 . ?
C11 H11B 0.9600 . ?
C11 H11C 0.9600 . ?
 
loop_
 _geom_angle_atom_site_label_1
 _geom_angle_atom_site_label_2
 _geom_angle_atom_site_label_3
 _geom_angle
 _geom_angle_site_symmetry_1
 _geom_angle_site_symmetry_3
 _geom_angle_publ_flag
C9 O1 C1 110.3(2) . . ?
C7 O4 H4 109.5 . . ?
O1 C1 C6 104.4(3) . . ?
O1 C1 C8 108.6(3) . . ?
C6 C1 C8 116.4(3) . . ?
O1 C1 C2 109.2(3) . . ?
C6 C1 C2 108.3(3) . . ?
C8 C1 C2 109.6(3) . . ?
C3 C2 C1 110.6(3) . . ?
C3 C2 H2A 109.5 . . ?
C1 C2 H2A 109.5 . . ?
C3 C2 H2B 109.5 . . ?
C1 C2 H2B 109.5 . . ?
H2A C2 H2B 108.1 . . ?
C2 C3 C4 114.8(4) . . ?
C2 C3 H3A 108.6 . . ?
C4 C3 H3A 108.6 . . ?
C2 C3 H3B 108.6 . . ?
C4 C3 H3B 108.6 . . ?
H3A C3 H3B 107.5 . . ?
C3 C4 C5 112.1(3) . . ?
C3 C4 H4A 109.2 . . ?
C5 C4 H4A 109.2 . . ?
C3 C4 H4B 109.2 . . ?
C5 C4 H4B 109.2 . . ?
H4A C4 H4B 107.9 . . ?
C7 C5 C6 111.8(3) . . ?
C7 C5 C4 110.2(3) . . ?
C6 C5 C4 108.7(3) . . ?
C7 C5 C9 112.6(3) . . ?
C6 C5 C9 100.4(3) . . ?
C4 C5 C9 112.7(3) . . ?
C1 C6 C5 99.9(3) . . ?
C1 C6 H6A 111.8 . . ?
C5 C6 H6A 111.8 . . ?
C1 C6 H6B 111.8 . . ?
C5 C6 H6B 111.8 . . ?
H6A C6 H6B 109.5 . . ?
O3 C7 O4 123.5(3) . . ?
O3 C7 C5 121.9(3) . . ?
O4 C7 C5 114.5(3) . . ?
C1 C8 I1 114.8(3) . . ?
C1 C8 H8A 108.6 . . ?
I1 C8 H8A 108.6 . . ?
C1 C8 H8B 108.6 . . ?
I1 C8 H8B 108.6 . . ?
H8A C8 H8B 107.5 . . ?
O1 C9 C12 111.1(3) . . ?
O1 C9 C10 109.0(3) . . ?
C12 C9 C10 108.2(3) . . ?
O1 C9 C5 103.0(2) . . ?
C12 C9 C5 113.4(3) . . ?
C10 C9 C5 112.0(3) . . ?
C13 C12 C9 127.4(4) . . ?
C13 C12 H12 116.3 . . ?
C9 C12 H12 116.3 . . ?
C12 C13 H13A 120.0 . . ?
C12 C13 H13B 120.0 . . ?
H13A C13 H13B 120.0 . . ?
C11 C10 C9 113.0(3) . . ?
C11 C10 H10A 109.0 . . ?
C9 C10 H10A 109.0 . . ?
C11 C10 H10B 109.0 . . ?
C9 C10 H10B 109.0 . . ?
H10A C10 H10B 107.8 . . ?
C10 C11 H11A 109.5 . . ?
C10 C11 H11B 109.5 . . ?
H11A C11 H11B 109.5 . . ?
C10 C11 H11C 109.5 . . ?
H11A C11 H11C 109.5 . . ?
H11B C11 H11C 109.5 . . ?
 
loop_
 _geom_torsion_atom_site_label_1
 _geom_torsion_atom_site_label_2
 _geom_torsion_atom_site_label_3
 _geom_torsion_atom_site_label_4
 _geom_torsion
 _geom_torsion_site_symmetry_1
 _geom_torsion_site_symmetry_2
 _geom_torsion_site_symmetry_3
 _geom_torsion_site_symmetry_4
 _geom_torsion_publ_flag
C9 O1 C1 C6 -18.8(4) . . . . ?
C9 O1 C1 C8 -143.6(3) . . . . ?
C9 O1 C1 C2 96.9(3) . . . . ?
O1 C1 C2 C3 -52.1(4) . . . . ?
C6 C1 C2 C3 61.0(4) . . . . ?
C8 C1 C2 C3 -171.0(4) . . . . ?
C1 C2 C3 C4 -40.4(5) . . . . ?
C2 C3 C4 C5 38.6(5) . . . . ?
C3 C4 C5 C7 -179.0(3) . . . . ?
C3 C4 C5 C6 -56.1(4) . . . . ?
C3 C4 C5 C9 54.3(4) . . . . ?
O1 C1 C6 C5 40.4(3) . . . . ?
C8 C1 C6 C5 160.1(3) . . . . ?
C2 C1 C6 C5 -75.9(3) . . . . ?
C7 C5 C6 C1 -165.1(3) . . . . ?
C4 C5 C6 C1 73.0(3) . . . . ?
C9 C5 C6 C1 -45.5(3) . . . . ?
C6 C5 C7 O3 -0.1(5) . . . . ?
C4 C5 C7 O3 120.9(4) . . . . ?
C9 C5 C7 O3 -112.3(4) . . . . ?
C6 C5 C7 O4 -178.8(3) . . . . ?
C4 C5 C7 O4 -57.8(4) . . . . ?
C9 C5 C7 O4 69.0(4) . . . . ?
O1 C1 C8 I1 63.6(4) . . . . ?
C6 C1 C8 I1 -53.9(4) . . . . ?
C2 C1 C8 I1 -177.2(3) . . . . ?
C1 O1 C9 C12 -132.2(3) . . . . ?
C1 O1 C9 C10 108.7(3) . . . . ?
C1 O1 C9 C5 -10.4(3) . . . . ?
C7 C5 C9 O1 154.1(3) . . . . ?
C6 C5 C9 O1 35.0(3) . . . . ?
C4 C5 C9 O1 -80.5(3) . . . . ?
C7 C5 C9 C12 -85.7(4) . . . . ?
C6 C5 C9 C12 155.2(3) . . . . ?
C4 C5 C9 C12 39.7(4) . . . . ?
C7 C5 C9 C10 37.1(4) . . . . ?
C6 C5 C9 C10 -82.0(3) . . . . ?
C4 C5 C9 C10 162.6(3) . . . . ?
O1 C9 C12 C13 -11.3(5) . . . . ?
C10 C9 C12 C13 108.3(5) . . . . ?
C5 C9 C12 C13 -126.8(4) . . . . ?
O1 C9 C10 C11 55.6(4) . . . . ?
C12 C9 C10 C11 -65.3(4) . . . . ?
C5 C9 C10 C11 168.9(3) . . . . ?
 
loop_
 _geom_hbond_atom_site_label_D
 _geom_hbond_atom_site_label_H
 _geom_hbond_atom_site_label_A
 _geom_hbond_distance_DH
 _geom_hbond_distance_HA
 _geom_hbond_distance_DA
 _geom_hbond_angle_DHA
 _geom_hbond_site_symmetry_A
O4 H4 O3  0.82 1.84 2.634(4) 161.6 3_556
 
_diffrn_measured_fraction_theta_max    0.971
_diffrn_reflns_theta_full              27.49
_diffrn_measured_fraction_theta_full   0.971
_refine_diff_density_max    1.054
_refine_diff_density_min   -1.074
_refine_diff_density_rms    0.069


#-end-end-end-end-end-end-end-end-end-end-end-end-end-end-end-end-end-end
 
#=======================================================================
#  Data block for (43) (one for each study in the paper)
#=======================================================================

data_jd7-3(43)
 
_audit_creation_method            SHELXL-97
_chemical_name_systematic
;
 (1R*, 5R*, 7S*)-7-(m-chlorobenzoyloxymethyl)-7-ethyl-5-
hydroxymethyl-6-oxabicyclo[3.2.1]octane-1-carboxylic acid
 
;
_chemical_name_common             ?
_chemical_melting_point           ?
_chemical_formula_moiety          'C20 H25 Cl O6'
_chemical_formula_sum
 'C20 H25 Cl O6'
_chemical_formula_weight          396.85
 
loop_
 _atom_type_symbol
 _atom_type_description
 _atom_type_scat_dispersion_real
 _atom_type_scat_dispersion_imag
 _atom_type_scat_source
 'C'  'C'   0.0033   0.0016
 'International Tables Vol C Tables 4.2.6.8 and 6.1.1.4'
 'H'  'H'   0.0000   0.0000
 'International Tables Vol C Tables 4.2.6.8 and 6.1.1.4'
 'O'  'O'   0.0106   0.0060
 'International Tables Vol C Tables 4.2.6.8 and 6.1.1.4'
 'Cl'  'Cl'   0.1484   0.1585
 'International Tables Vol C Tables 4.2.6.8 and 6.1.1.4'
 
_symmetry_cell_setting            'Triclinic'
_symmetry_space_group_name_H-M    'P-1'
 
loop_
 _symmetry_equiv_pos_as_xyz
 'x, y, z'
 '-x, -y, -z'
 
_cell_length_a                    7.6390(4)
_cell_length_b                    8.0350(9)
_cell_length_c                    16.4990(16)
_cell_angle_alpha                 89.130(5)
_cell_angle_beta                  89.221(5)
_cell_angle_gamma                 80.184(6)
_cell_volume                      997.70(16)
_cell_formula_units_Z             2
_cell_measurement_temperature     293(2)
_cell_measurement_reflns_used     4412
_cell_measurement_theta_min       2.47
_cell_measurement_theta_max       27.5 
 
_computing_cell_refinement 'HKL Denzo and Scalepack (Otwinowski & Minor 1997)'
 
_exptl_crystal_description        plate
_exptl_crystal_colour             colourless
_exptl_crystal_size_max           0.45
_exptl_crystal_size_mid           0.30
_exptl_crystal_size_min           0.05
_exptl_crystal_density_meas       ?
_exptl_crystal_density_diffrn     1.321
_exptl_crystal_density_method     'not measured'
_exptl_crystal_F_000              420
_exptl_absorpt_coefficient_mu     0.224
_exptl_absorpt_correction_type    none
_exptl_absorpt_correction_T_min   0.9058
_exptl_absorpt_correction_T_max   0.9889
_exptl_absorpt_process_details    ?
 
_exptl_special_details
;
 ?
;
 
_diffrn_ambient_temperature       293(2)
_diffrn_radiation_wavelength      0.71073
_diffrn_radiation_type            MoK\a
_diffrn_radiation_source          'fine-focus sealed tube'
_diffrn_measurement_device_type  'KappaCCD'
_diffrn_measurement_device  '95mm CCD camera on \k-goniostat'
_diffrn_detector_area_resol_mean    9
_diffrn_radiation_monochromator        'horizontally mounted graphite crystal'
_diffrn_measurement_method     '\f and \w'

_diffrn_reflns_number             4412
_diffrn_reflns_av_R_equivalents   0.0000
_diffrn_reflns_av_sigmaI/netI     0.0415
_diffrn_reflns_limit_h_min        0
_diffrn_reflns_limit_h_max        9
_diffrn_reflns_limit_k_min        -10
_diffrn_reflns_limit_k_max        10
_diffrn_reflns_limit_l_min        -21
_diffrn_reflns_limit_l_max        21
_diffrn_reflns_theta_min          2.47
_diffrn_reflns_theta_max          27.50
_reflns_number_total              4412
_reflns_number_gt                 3580
_reflns_threshold_expression      >2sigma(I)
 
_computing_data_collection 'Collect (Nonius BV, 2000)'
_computing_data_reduction  'HKL Denzo and Scalepak (Otwinowski & Minor, 1997)'
_computing_structure_solution     'SIR97 (Altomare et al., 1999)'
_computing_structure_refinement   'SHELXL-97 (Sheldrick, 1997)'
_computing_molecular_graphics  
  'PLATON (Spek, 2003)'
_computing_publication_material  
'SHELXL-97, WinGX (Farrugia, 1999) and PLATON'

 _refine_special_details
;
 Refinement of F^2^ against ALL reflections.  The weighted R-factor wR and
 goodness of fit S are based on F^2^, conventional R-factors R are based
 on F, with F set to zero for negative F^2^. The threshold expression of
 F^2^ > 2sigma(F^2^) is used only for calculating R-factors(gt) etc. and is
 not relevant to the choice of reflections for refinement.  R-factors based
 on F^2^ are statistically about twice as large as those based on F, and R-
 factors based on ALL data will be even larger.
;
 
_refine_ls_structure_factor_coef  Fsqd
_refine_ls_matrix_type            full
_refine_ls_weighting_scheme       calc
_refine_ls_weighting_details
 'calc w=1/[\s^2^(Fo^2^)+(0.0610P)^2^+1.0064P] where P=(Fo^2^+2Fc^2^)/3'
_atom_sites_solution_primary      direct
_atom_sites_solution_secondary    difmap
_atom_sites_solution_hydrogens    geom
_refine_ls_hydrogen_treatment     mixed
_refine_ls_extinction_method      SHELXL
_refine_ls_extinction_coef        0.253(19)
_refine_ls_extinction_expression
 'Fc^*^=kFc[1+0.001xFc^2^\l^3^/sin(2\q)]^-1/4^'
_refine_ls_number_reflns          4412
_refine_ls_number_parameters      246
_refine_ls_number_restraints      0
_refine_ls_R_factor_all           0.0954
_refine_ls_R_factor_gt            0.0784
_refine_ls_wR_factor_ref          0.1956
_refine_ls_wR_factor_gt           0.1768
_refine_ls_goodness_of_fit_ref    1.083
_refine_ls_restrained_S_all       1.083
_refine_ls_shift/su_max           0.005
_refine_ls_shift/su_mean          0.000
 
loop_
 _atom_site_label
 _atom_site_type_symbol
 _atom_site_fract_x
 _atom_site_fract_y
 _atom_site_fract_z
 _atom_site_U_iso_or_equiv
 _atom_site_adp_type
 _atom_site_occupancy
 _atom_site_symmetry_multiplicity
 _atom_site_calc_flag
 _atom_site_refinement_flags
 _atom_site_disorder_assembly
 _atom_site_disorder_group
O1 O 0.7262(2) 0.0852(2) 0.08442(10) 0.0365(4) Uani 1 1 d . . .
Cl1 Cl -0.09411(19) 0.2538(2) 0.55048(9) 0.1338(7) Uani 1 1 d . . .
O5 O 0.4854(3) 0.1600(3) 0.27530(11) 0.0538(6) Uani 1 1 d . . .
O4 O 0.4656(3) 0.5122(3) 0.21243(12) 0.0624(6) Uani 1 1 d . . .
O6 O 0.2391(3) 0.0497(4) 0.27438(15) 0.0852(9) Uani 1 1 d . . .
O2 O 0.4342(3) 0.1927(3) -0.02736(13) 0.0537(5) Uani 1 1 d . . .
H2 H 0.4010 0.1106 -0.0472 0.064 Uiso 1 1 calc R . .
O3 O 0.7038(3) 0.4578(3) 0.29108(13) 0.0677(7) Uani 1 1 d . . .
C1 C 0.7177(3) 0.2276(3) 0.02717(15) 0.0374(6) Uani 1 1 d . . .
C2 C 0.9076(4) 0.2499(4) 0.00490(18) 0.0506(7) Uani 1 1 d . . .
H2A H 0.9056 0.3509 -0.0281 0.061 Uiso 1 1 d R . .
H2B H 0.9626 0.1539 -0.0251 0.061 Uiso 1 1 d R . .
C3 C 1.0162(4) 0.2616(4) 0.0808(2) 0.0563(8) Uani 1 1 d . . .
H3A H 1.1186 0.3127 0.0662 0.068 Uiso 1 1 calc R . .
H3B H 1.0598 0.1482 0.1009 0.068 Uiso 1 1 calc R . .
C4 C 0.9134(4) 0.3638(4) 0.14942(19) 0.0497(7) Uani 1 1 d . . .
H4A H 0.9144 0.4818 0.1384 0.060 Uiso 1 1 d R . .
H4B H 0.9734 0.3328 0.1994 0.060 Uiso 1 1 d R . .
C5 C 0.7184(3) 0.3366(3) 0.15800(15) 0.0376(6) Uani 1 1 d . . .
C6 C 0.6289(3) 0.3784(3) 0.07611(15) 0.0384(6) Uani 1 1 d . . .
H6A H 0.5029 0.3824 0.0801 0.046 Uiso 1 1 d R . .
H6B H 0.6539 0.4824 0.0541 0.046 Uiso 1 1 d R . .
C7 C 0.6322(4) 0.4405(3) 0.22850(16) 0.0463(6) Uani 1 1 d . . .
C8 C 0.6158(4) 0.1890(3) -0.04622(15) 0.0450(6) Uani 1 1 d . . .
H8A H 0.6248 0.2720 -0.0872 0.054 Uiso 1 1 d R . .
H8B H 0.6668 0.0790 -0.0652 0.054 Uiso 1 1 d R . .
C9 C 0.7017(3) 0.1456(3) 0.16741(14) 0.0359(5) Uani 1 1 d . . .
C10 C 0.3667(6) 0.6061(6) 0.2774(2) 0.0892(14) Uani 1 1 d . . .
H10A H 0.2487 0.6511 0.2594 0.107 Uiso 1 1 d R . .
H10B H 0.4267 0.6981 0.2924 0.107 Uiso 1 1 d R . .
H10C H 0.3607 0.5341 0.3244 0.107 Uiso 1 1 d R . .
C11 C 0.8386(4) 0.0411(4) 0.22294(18) 0.0492(7) Uani 1 1 d . . .
H11A H 0.8176 0.0821 0.2779 0.059 Uiso 1 1 d R . .
H11B H 0.9546 0.0561 0.2049 0.059 Uiso 1 1 d R . .
C12 C 0.8352(5) -0.1476(4) 0.2241(2) 0.0719(10) Uani 1 1 d . . .
H12A H 0.9242 -0.2046 0.2601 0.086 Uiso 1 1 d R . .
H12B H 0.8572 -0.1906 0.1701 0.086 Uiso 1 1 d R . .
H12C H 0.7202 -0.1646 0.2421 0.086 Uiso 1 1 d R . .
C13 C 0.5149(3) 0.1180(4) 0.19079(14) 0.0423(6) Uani 1 1 d . . .
H33 H 0.4309 0.1910 0.1578 0.051 Uiso 1 1 d R . .
H13B H 0.5029 0.0030 0.1828 0.051 Uiso 1 1 d R . .
C14 C 0.3375(3) 0.1243(4) 0.30902(16) 0.0469(7) Uani 1 1 d . . .
C15 C 0.3107(4) 0.1847(4) 0.39380(17) 0.0525(7) Uani 1 1 d . . .
C16 C 0.4430(6) 0.2390(6) 0.4366(2) 0.0826(13) Uani 1 1 d . . .
H16 H 0.5590 0.2340 0.4136 0.099 Uiso 1 1 d R . .
C17 C 0.4080(7) 0.2982(8) 0.5148(2) 0.1117(19) Uani 1 1 d . . .
H17 H 0.4960 0.3412 0.5448 0.134 Uiso 1 1 d R . .
C18 C 0.2442(7) 0.3026(6) 0.5498(2) 0.0929(14) Uani 1 1 d . . .
H18 H 0.2222 0.3426 0.6038 0.111 Uiso 1 1 d R . .
C19 C 0.1148(6) 0.2478(5) 0.5071(2) 0.0765(11) Uani 1 1 d . . .
C20 C 0.1450(5) 0.1892(5) 0.4288(2) 0.0660(9) Uani 1 1 d . . .
H20 H 0.0520 0.1512 0.3998 0.079 Uiso 1 1 d R . .
 
loop_
 _atom_site_aniso_label
 _atom_site_aniso_U_11
 _atom_site_aniso_U_22
 _atom_site_aniso_U_33
 _atom_site_aniso_U_23
 _atom_site_aniso_U_13
 _atom_site_aniso_U_12
O1 0.0453(9) 0.0298(9) 0.0333(9) -0.0007(7) 0.0007(7) -0.0036(7)
Cl1 0.1104(10) 0.1950(16) 0.0982(10) -0.0452(10) 0.0609(8) -0.0330(10)
O5 0.0585(12) 0.0803(15) 0.0302(9) -0.0114(9) 0.0036(8) -0.0335(10)
O4 0.0660(13) 0.0687(14) 0.0425(11) -0.0138(10) 0.0040(9) 0.0180(11)
O6 0.0583(14) 0.149(3) 0.0607(15) -0.0423(16) 0.0125(11) -0.0502(15)
O2 0.0567(12) 0.0483(12) 0.0555(12) -0.0157(9) -0.0065(9) -0.0053(9)
O3 0.0787(15) 0.0780(16) 0.0489(13) -0.0241(11) -0.0092(11) -0.0180(12)
C1 0.0468(13) 0.0289(12) 0.0347(13) 0.0011(9) 0.0050(10) -0.0015(10)
C2 0.0576(16) 0.0388(14) 0.0550(17) -0.0017(12) 0.0189(13) -0.0085(12)
C3 0.0417(14) 0.0531(17) 0.076(2) -0.0061(15) 0.0099(14) -0.0124(12)
C4 0.0493(15) 0.0432(15) 0.0591(17) -0.0038(13) -0.0010(13) -0.0146(12)
C5 0.0418(13) 0.0334(13) 0.0370(13) -0.0045(10) -0.0021(10) -0.0046(10)
C6 0.0475(14) 0.0316(12) 0.0336(12) -0.0028(10) 0.0017(10) 0.0005(10)
C7 0.0586(16) 0.0407(15) 0.0401(15) -0.0075(11) -0.0010(12) -0.0088(12)
C8 0.0630(17) 0.0360(14) 0.0331(13) -0.0035(10) 0.0039(11) 0.0003(12)
C9 0.0410(12) 0.0365(13) 0.0308(12) -0.0025(9) -0.0028(9) -0.0076(10)
C10 0.100(3) 0.095(3) 0.058(2) -0.027(2) 0.019(2) 0.027(2)
C11 0.0493(15) 0.0522(17) 0.0458(15) 0.0052(12) -0.0114(12) -0.0073(12)
C12 0.084(2) 0.053(2) 0.077(2) 0.0219(17) -0.0198(19) -0.0061(17)
C13 0.0480(14) 0.0536(16) 0.0282(12) -0.0061(11) -0.0017(10) -0.0166(12)
C14 0.0410(13) 0.0613(18) 0.0402(14) -0.0078(12) -0.0013(11) -0.0128(12)
C15 0.0597(17) 0.0647(19) 0.0368(14) -0.0050(13) 0.0025(12) -0.0211(14)
C16 0.088(3) 0.137(4) 0.0374(17) -0.0169(19) 0.0043(16) -0.057(3)
C17 0.131(4) 0.183(5) 0.045(2) -0.032(3) 0.011(2) -0.092(4)
C18 0.134(4) 0.117(4) 0.0395(18) -0.024(2) 0.020(2) -0.055(3)
C19 0.091(3) 0.087(3) 0.054(2) -0.0129(18) 0.0288(18) -0.023(2)
C20 0.0631(19) 0.088(3) 0.0491(18) -0.0164(17) 0.0118(14) -0.0197(17)
 
_geom_special_details
;
 All esds (except the esd in the dihedral angle between two l.s. planes)
 are estimated using the full covariance matrix.  The cell esds are taken
 into account individually in the estimation of esds in distances, angles
 and torsion angles; correlations between esds in cell parameters are only
 used when they are defined by crystal symmetry.  An approximate (isotropic)
 treatment of cell esds is used for estimating esds involving l.s. planes.
;
 
loop_
 _geom_bond_atom_site_label_1
 _geom_bond_atom_site_label_2
 _geom_bond_distance
 _geom_bond_site_symmetry_2
 _geom_bond_publ_flag
O1 C9 1.459(3) . ?
O1 C1 1.466(3) . ?
Cl1 C19 1.734(4) . ?
O5 C14 1.325(3) . ?
O5 C13 1.445(3) . ?
O4 C7 1.333(3) . ?
O4 C10 1.449(4) . ?
O6 C14 1.194(3) . ?
O2 C8 1.413(3) . ?
O2 H2 0.8200 . ?
O3 C7 1.196(3) . ?
C1 C8 1.513(4) . ?
C1 C6 1.521(3) . ?
C1 C2 1.531(4) . ?
C2 C3 1.525(5) . ?
C2 H2A 0.9684 . ?
C2 H2B 0.9550 . ?
C3 C4 1.535(4) . ?
C3 H3A 0.9700 . ?
C3 H3B 0.9700 . ?
C4 C5 1.546(4) . ?
C4 H4A 0.9639 . ?
C4 H4B 0.9580 . ?
C5 C7 1.518(3) . ?
C5 C6 1.529(3) . ?
C5 C9 1.567(3) . ?
C6 H6A 0.9590 . ?
C6 H6B 0.9539 . ?
C8 H8A 0.9528 . ?
C8 H8B 0.9586 . ?
C9 C13 1.525(3) . ?
C9 C11 1.530(4) . ?
C10 H10A 0.9614 . ?
C10 H10B 0.9705 . ?
C10 H10C 0.9657 . ?
C11 C12 1.521(4) . ?
C11 H11A 0.9720 . ?
C11 H11B 0.9571 . ?
C12 H12A 0.9599 . ?
C12 H12B 0.9627 . ?
C12 H12C 0.9546 . ?
C13 H33 0.9611 . ?
C13 H13B 0.9553 . ?
C14 C15 1.488(4) . ?
C15 C16 1.375(4) . ?
C15 C20 1.379(4) . ?
C16 C17 1.387(5) . ?
C16 H16 0.9539 . ?
C17 C18 1.366(6) . ?
C17 H17 0.9538 . ?
C18 C19 1.358(6) . ?
C18 H18 0.9547 . ?
C19 C20 1.385(5) . ?
C20 H20 0.9564 . ?
 
loop_
 _geom_angle_atom_site_label_1
 _geom_angle_atom_site_label_2
 _geom_angle_atom_site_label_3
 _geom_angle
 _geom_angle_site_symmetry_1
 _geom_angle_site_symmetry_3
 _geom_angle_publ_flag
C9 O1 C1 110.52(17) . . ?
C14 O5 C13 116.5(2) . . ?
C7 O4 C10 116.6(3) . . ?
C8 O2 H2 109.5 . . ?
O1 C1 C8 108.00(19) . . ?
O1 C1 C6 103.65(18) . . ?
C8 C1 C6 115.0(2) . . ?
O1 C1 C2 108.5(2) . . ?
C8 C1 C2 111.9(2) . . ?
C6 C1 C2 109.3(2) . . ?
C3 C2 C1 110.9(2) . . ?
C3 C2 H2A 109.6 . . ?
C1 C2 H2A 110.0 . . ?
C3 C2 H2B 108.4 . . ?
C1 C2 H2B 108.6 . . ?
H2A C2 H2B 109.3 . . ?
C2 C3 C4 114.3(2) . . ?
C2 C3 H3A 108.7 . . ?
C4 C3 H3A 108.7 . . ?
C2 C3 H3B 108.7 . . ?
C4 C3 H3B 108.7 . . ?
H3A C3 H3B 107.6 . . ?
C3 C4 C5 113.5(2) . . ?
C3 C4 H4A 108.0 . . ?
C5 C4 H4A 108.7 . . ?
C3 C4 H4B 108.7 . . ?
C5 C4 H4B 109.1 . . ?
H4A C4 H4B 108.8 . . ?
C7 C5 C6 115.1(2) . . ?
C7 C5 C4 108.6(2) . . ?
C6 C5 C4 107.9(2) . . ?
C7 C5 C9 112.0(2) . . ?
C6 C5 C9 100.40(19) . . ?
C4 C5 C9 112.7(2) . . ?
C1 C6 C5 100.31(19) . . ?
C1 C6 H6A 111.4 . . ?
C5 C6 H6A 111.5 . . ?
C1 C6 H6B 111.9 . . ?
C5 C6 H6B 111.5 . . ?
H6A C6 H6B 109.9 . . ?
O3 C7 O4 123.4(3) . . ?
O3 C7 C5 124.7(3) . . ?
O4 C7 C5 111.9(2) . . ?
O2 C8 C1 111.4(2) . . ?
O2 C8 H8A 108.5 . . ?
C1 C8 H8A 108.8 . . ?
O2 C8 H8B 109.4 . . ?
C1 C8 H8B 108.6 . . ?
H8A C8 H8B 110.2 . . ?
O1 C9 C13 104.22(18) . . ?
O1 C9 C11 110.2(2) . . ?
C13 C9 C11 110.3(2) . . ?
O1 C9 C5 102.74(18) . . ?
C13 C9 C5 113.4(2) . . ?
C11 C9 C5 115.2(2) . . ?
O4 C10 H10A 109.5 . . ?
O4 C10 H10B 109.1 . . ?
H10A C10 H10B 109.5 . . ?
O4 C10 H10C 110.5 . . ?
H10A C10 H10C 109.8 . . ?
H10B C10 H10C 108.4 . . ?
C12 C11 C9 114.8(2) . . ?
C12 C11 H11A 108.1 . . ?
C9 C11 H11A 108.5 . . ?
C12 C11 H11B 107.3 . . ?
C9 C11 H11B 108.3 . . ?
H11A C11 H11B 109.7 . . ?
C11 C12 H12A 110.0 . . ?
C11 C12 H12B 109.2 . . ?
H12A C12 H12B 109.8 . . ?
C11 C12 H12C 108.3 . . ?
H12A C12 H12C 110.0 . . ?
H12B C12 H12C 109.4 . . ?
O5 C13 C9 107.97(19) . . ?
O5 C13 H33 110.1 . . ?
C9 C13 H33 108.7 . . ?
O5 C13 H13B 109.7 . . ?
C9 C13 H13B 110.5 . . ?
H33 C13 H13B 109.8 . . ?
O6 C14 O5 122.7(3) . . ?
O6 C14 C15 124.6(3) . . ?
O5 C14 C15 112.7(2) . . ?
C16 C15 C20 119.9(3) . . ?
C16 C15 C14 122.3(3) . . ?
C20 C15 C14 117.8(3) . . ?
C15 C16 C17 119.5(4) . . ?
C15 C16 H16 120.7 . . ?
C17 C16 H16 119.8 . . ?
C18 C17 C16 120.9(4) . . ?
C18 C17 H17 118.0 . . ?
C16 C17 H17 121.0 . . ?
C19 C18 C17 119.1(3) . . ?
C19 C18 H18 120.8 . . ?
C17 C18 H18 120.1 . . ?
C18 C19 C20 121.4(4) . . ?
C18 C19 Cl1 119.6(3) . . ?
C20 C19 Cl1 118.9(3) . . ?
C15 C20 C19 119.2(3) . . ?
C15 C20 H20 120.7 . . ?
C19 C20 H20 120.1 . . ?
 
loop_
 _geom_torsion_atom_site_label_1
 _geom_torsion_atom_site_label_2
 _geom_torsion_atom_site_label_3
 _geom_torsion_atom_site_label_4
 _geom_torsion
 _geom_torsion_site_symmetry_1
 _geom_torsion_site_symmetry_2
 _geom_torsion_site_symmetry_3
 _geom_torsion_site_symmetry_4
 _geom_torsion_publ_flag
C9 O1 C1 C8 -140.0(2) . . . . ?
C9 O1 C1 C6 -17.5(2) . . . . ?
C9 O1 C1 C2 98.6(2) . . . . ?
O1 C1 C2 C3 -52.2(3) . . . . ?
C8 C1 C2 C3 -171.3(2) . . . . ?
C6 C1 C2 C3 60.2(3) . . . . ?
C1 C2 C3 C4 -39.3(3) . . . . ?
C2 C3 C4 C5 38.2(4) . . . . ?
C3 C4 C5 C7 178.8(2) . . . . ?
C3 C4 C5 C6 -55.8(3) . . . . ?
C3 C4 C5 C9 54.1(3) . . . . ?
O1 C1 C6 C5 39.9(2) . . . . ?
C8 C1 C6 C5 157.6(2) . . . . ?
C2 C1 C6 C5 -75.6(2) . . . . ?
C7 C5 C6 C1 -166.8(2) . . . . ?
C4 C5 C6 C1 71.8(2) . . . . ?
C9 C5 C6 C1 -46.3(2) . . . . ?
C10 O4 C7 O3 -4.0(5) . . . . ?
C10 O4 C7 C5 176.4(3) . . . . ?
C6 C5 C7 O3 -160.4(3) . . . . ?
C4 C5 C7 O3 -39.4(4) . . . . ?
C9 C5 C7 O3 85.7(3) . . . . ?
C6 C5 C7 O4 19.2(3) . . . . ?
C4 C5 C7 O4 140.3(2) . . . . ?
C9 C5 C7 O4 -94.6(3) . . . . ?
O1 C1 C8 O2 69.2(3) . . . . ?
C6 C1 C8 O2 -46.0(3) . . . . ?
C2 C1 C8 O2 -171.5(2) . . . . ?
C1 O1 C9 C13 106.6(2) . . . . ?
C1 O1 C9 C11 -135.1(2) . . . . ?
C1 O1 C9 C5 -11.8(2) . . . . ?
C7 C5 C9 O1 158.83(19) . . . . ?
C6 C5 C9 O1 36.2(2) . . . . ?
C4 C5 C9 O1 -78.3(2) . . . . ?
C7 C5 C9 C13 47.0(3) . . . . ?
C6 C5 C9 C13 -75.7(2) . . . . ?
C4 C5 C9 C13 169.8(2) . . . . ?
C7 C5 C9 C11 -81.3(3) . . . . ?
C6 C5 C9 C11 156.0(2) . . . . ?
C4 C5 C9 C11 41.5(3) . . . . ?
O1 C9 C11 C12 -57.6(3) . . . . ?
C13 C9 C11 C12 56.9(3) . . . . ?
C5 C9 C11 C12 -173.2(3) . . . . ?
C14 O5 C13 C9 -172.1(2) . . . . ?
O1 C9 C13 O5 174.7(2) . . . . ?
C11 C9 C13 O5 56.4(3) . . . . ?
C5 C9 C13 O5 -74.4(3) . . . . ?
C13 O5 C14 O6 5.7(5) . . . . ?
C13 O5 C14 C15 -175.2(2) . . . . ?
O6 C14 C15 C16 166.5(4) . . . . ?
O5 C14 C15 C16 -12.6(5) . . . . ?
O6 C14 C15 C20 -15.1(5) . . . . ?
O5 C14 C15 C20 165.8(3) . . . . ?
C20 C15 C16 C17 -0.1(7) . . . . ?
C14 C15 C16 C17 178.3(4) . . . . ?
C15 C16 C17 C18 0.2(8) . . . . ?
C16 C17 C18 C19 0.2(8) . . . . ?
C17 C18 C19 C20 -0.7(8) . . . . ?
C17 C18 C19 Cl1 -179.6(4) . . . . ?
C16 C15 C20 C19 -0.4(6) . . . . ?
C14 C15 C20 C19 -178.8(3) . . . . ?
C18 C19 C20 C15 0.8(7) . . . . ?
Cl1 C19 C20 C15 179.8(3) . . . . ?
 
loop_
 _geom_hbond_atom_site_label_D
 _geom_hbond_atom_site_label_H
 _geom_hbond_atom_site_label_A
 _geom_hbond_distance_DH
 _geom_hbond_distance_HA
 _geom_hbond_distance_DA
 _geom_hbond_angle_DHA
 _geom_hbond_site_symmetry_A
O2 H2 O1  0.82 2.09 2.898(3) 169.3 2_655
 
_diffrn_measured_fraction_theta_max    0.965
_diffrn_reflns_theta_full              27.50
_diffrn_measured_fraction_theta_full   0.965
_refine_diff_density_max    0.457
_refine_diff_density_min   -0.300
_refine_diff_density_rms    0.074

#-end-end-end-end-end-end-end-end-end-end-end-end-end-end-end-end-end-end
 
#=======================================================================
#  Data block for (47) (one for each study in the paper)
#=======================================================================
data_js-1(47)
 
_audit_creation_method            SHELXL-97
_chemical_name_systematic
;
 (1R*, 3S*)-3-acetoxymethyl-1-(1-S-ethyl-oxiranyl)-3-
hydroxy-cyclohexanecarboxylic acid
 methyl ester
;
_chemical_name_common             ?
_chemical_melting_point           ?
_chemical_formula_moiety          'C15 H24 O6'
_chemical_formula_sum
 'C15 H24 O6'
_chemical_formula_weight          300.34
 
loop_
 _atom_type_symbol
 _atom_type_description
 _atom_type_scat_dispersion_real
 _atom_type_scat_dispersion_imag
 _atom_type_scat_source
 'C'  'C'   0.0033   0.0016
 'International Tables Vol C Tables 4.2.6.8 and 6.1.1.4'
 'H'  'H'   0.0000   0.0000
 'International Tables Vol C Tables 4.2.6.8 and 6.1.1.4'
 'O'  'O'   0.0106   0.0060
 'International Tables Vol C Tables 4.2.6.8 and 6.1.1.4'
 
_symmetry_cell_setting            'Triclinic'
_symmetry_space_group_name_H-M    'P-1'
 
loop_
 _symmetry_equiv_pos_as_xyz
 'x, y, z'
 '-x, -y, -z'
 
_cell_length_a                    8.4950(2)
_cell_length_b                    9.7150(3)
_cell_length_c                    9.9900(4)
_cell_angle_alpha                 81.0110(10)
_cell_angle_beta                  76.2690(10)
_cell_angle_gamma                 80.257(2)
_cell_volume                      783.53(4)
_cell_formula_units_Z             2
_cell_measurement_temperature     293(2)
_cell_measurement_reflns_used     3513
_cell_measurement_theta_min       2.11
_cell_measurement_theta_max       27.49
 
_computing_cell_refinement 'HKL Denzo and Scalepack (Otwinowski & Minor 1997)'
 
_exptl_crystal_description        plate
_exptl_crystal_colour             colourless
_exptl_crystal_size_max           0.45
_exptl_crystal_size_mid           0.40
_exptl_crystal_size_min           0.10
_exptl_crystal_density_meas       ?
_exptl_crystal_density_diffrn     1.273
_exptl_crystal_density_method     'not measured'
_exptl_crystal_F_000              324
_exptl_absorpt_coefficient_mu     0.098
_exptl_absorpt_correction_type    none
_exptl_absorpt_correction_T_min   0.9574
_exptl_absorpt_correction_T_max   0.9903
_exptl_absorpt_process_details    ?
 
_exptl_special_details
;
 ?
;
 
_diffrn_ambient_temperature       293(2)
_diffrn_radiation_wavelength      0.71073
_diffrn_radiation_type            MoK\a
_diffrn_radiation_source          'fine-focus sealed tube'
_diffrn_measurement_device_type  'KappaCCD'
_diffrn_measurement_device  '95mm CCD camera on \k-goniostat'
_diffrn_detector_area_resol_mean    9
_diffrn_radiation_monochromator        'horizontally mounted graphite crystal'
_diffrn_measurement_method     '\f and \w'

_diffrn_reflns_number             3513
_diffrn_reflns_av_R_equivalents   0.0000
_diffrn_reflns_av_sigmaI/netI     0.0368
_diffrn_reflns_limit_h_min        0
_diffrn_reflns_limit_h_max        11
_diffrn_reflns_limit_k_min        -12
_diffrn_reflns_limit_k_max        12
_diffrn_reflns_limit_l_min        -12
_diffrn_reflns_limit_l_max        12
_diffrn_reflns_theta_min          2.11
_diffrn_reflns_theta_max          27.49
_reflns_number_total              3513
_reflns_number_gt                 2917
_reflns_threshold_expression      >2sigma(I)
 
_computing_data_collection 'Collect (Nonius BV, 2000)'
_computing_data_reduction  'HKL Denzo and Scalepak (Otwinowski & Minor, 1997)'
_computing_structure_solution     'SIR97 (Altomare et al., 1999)'
_computing_structure_refinement   'SHELXL-97 (Sheldrick, 1997)'
_computing_molecular_graphics  
  'PLATON (Spek, 2003)'
_computing_publication_material  
'SHELXL-97, WinGX (Farrugia, 1999) and PLATON'
  
_refine_special_details
;
 Refinement of F^2^ against ALL reflections.  The weighted R-factor wR and
 goodness of fit S are based on F^2^, conventional R-factors R are based
 on F, with F set to zero for negative F^2^. The threshold expression of
 F^2^ > 2sigma(F^2^) is used only for calculating R-factors(gt) etc. and is
 not relevant to the choice of reflections for refinement.  R-factors based
 on F^2^ are statistically about twice as large as those based on F, and R-
 factors based on ALL data will be even larger.
;
 
_refine_ls_structure_factor_coef  Fsqd
_refine_ls_matrix_type            full
_refine_ls_weighting_scheme       calc
_refine_ls_weighting_details
 'calc w=1/[\s^2^(Fo^2^)+(0.0605P)^2^+0.7790P] where P=(Fo^2^+2Fc^2^)/3'
_atom_sites_solution_primary      direct
_atom_sites_solution_secondary    difmap
_atom_sites_solution_hydrogens    geom
_refine_ls_hydrogen_treatment     mixed
_refine_ls_extinction_method      none
_refine_ls_extinction_coef        ?
_refine_ls_number_reflns          3513
_refine_ls_number_parameters      191
_refine_ls_number_restraints      0
_refine_ls_R_factor_all           0.0852
_refine_ls_R_factor_gt            0.0692
_refine_ls_wR_factor_ref          0.1997
_refine_ls_wR_factor_gt           0.1714
_refine_ls_goodness_of_fit_ref    1.042
_refine_ls_restrained_S_all       1.042
_refine_ls_shift/su_max           0.001
_refine_ls_shift/su_mean          0.000
 
loop_
 _atom_site_label
 _atom_site_type_symbol
 _atom_site_fract_x
 _atom_site_fract_y
 _atom_site_fract_z
 _atom_site_U_iso_or_equiv
 _atom_site_adp_type
 _atom_site_occupancy
 _atom_site_symmetry_multiplicity
 _atom_site_calc_flag
 _atom_site_refinement_flags
 _atom_site_disorder_assembly
 _atom_site_disorder_group
O1 O 0.53330(19) 0.34426(17) 0.37997(19) 0.0459(4) Uani 1 1 d . . .
H1 H 0.5299 0.4244 0.3390 0.055 Uiso 1 1 calc R . .
O2 O 0.6775(2) 0.3424(2) 0.0982(2) 0.0603(5) Uani 1 1 d . . .
O3 O 0.4920(2) 0.35161(18) 0.7076(2) 0.0525(5) Uani 1 1 d . . .
O4 O 0.40867(18) 0.16450(17) 0.65401(18) 0.0455(4) Uani 1 1 d . . .
O5 O 0.9307(3) 0.3141(3) -0.0284(3) 0.1016(10) Uani 1 1 d . . .
O6 O 0.8702(2) -0.0565(2) 0.6397(2) 0.0656(6) Uani 1 1 d . . .
C1 C 0.6938(3) 0.2686(2) 0.3386(3) 0.0420(5) Uani 1 1 d . . .
C2 C 0.8257(3) 0.3583(3) 0.3355(3) 0.0514(6) Uani 1 1 d . . .
H2A H 0.9326 0.3064 0.3030 0.062 Uiso 1 1 calc R . .
H2B H 0.8127 0.4430 0.2711 0.062 Uiso 1 1 calc R . .
C3 C 0.8153(3) 0.3982(3) 0.4785(3) 0.0564(7) Uani 1 1 d . . .
H3A H 0.7135 0.4594 0.5060 0.068 Uiso 1 1 calc R . .
H3B H 0.9047 0.4499 0.4747 0.068 Uiso 1 1 calc R . .
C4 C 0.8234(3) 0.2692(3) 0.5867(3) 0.0529(6) Uani 1 1 d . . .
H4A H 0.8084 0.3002 0.6771 0.063 Uiso 1 1 calc R . .
H4B H 0.9315 0.2153 0.5658 0.063 Uiso 1 1 calc R . .
C5 C 0.6945(3) 0.1728(2) 0.5934(3) 0.0410(5) Uani 1 1 d . . .
C6 C 0.7047(3) 0.1386(2) 0.4455(2) 0.0403(5) Uani 1 1 d . . .
H6A H 0.8072 0.0790 0.4160 0.048 Uiso 1 1 calc R . .
H6B H 0.6166 0.0858 0.4481 0.048 Uiso 1 1 calc R . .
C7 C 0.5227(3) 0.2433(2) 0.6562(2) 0.0410(5) Uani 1 1 d . . .
C8 C 0.7099(3) 0.2211(3) 0.1967(3) 0.0525(6) Uani 1 1 d . . .
H8A H 0.8194 0.1731 0.1656 0.063 Uiso 1 1 calc R . .
H8B H 0.6327 0.1560 0.2034 0.063 Uiso 1 1 calc R . .
C9 C 0.2404(3) 0.2241(3) 0.7031(3) 0.0580(7) Uani 1 1 d . . .
H9A H 0.1691 0.1592 0.6980 0.087 Uiso 1 1 calc R . .
H9B H 0.2160 0.3108 0.6464 0.087 Uiso 1 1 calc R . .
H9C H 0.2246 0.2418 0.7976 0.087 Uiso 1 1 calc R . .
C10 C 0.7280(3) 0.0376(3) 0.6938(3) 0.0471(6) Uani 1 1 d . . .
C11 C 0.7140(4) -0.1013(3) 0.6622(3) 0.0595(7) Uani 1 1 d . . .
H11A H 0.6850 -0.1729 0.7395 0.071 Uiso 1 1 calc R . .
H11B H 0.6712 -0.1057 0.5814 0.071 Uiso 1 1 calc R . .
C12 C 0.7123(6) 0.0609(4) 0.8429(4) 0.0872(12) Uani 1 1 d . . .
H12A H 0.7817 0.1306 0.8430 0.105 Uiso 1 1 calc R . .
H12B H 0.6003 0.1014 0.8780 0.105 Uiso 1 1 calc R . .
C13 C 0.7532(8) -0.0616(5) 0.9415(4) 0.122(2) Uani 1 1 d . . .
H13A H 0.7372 -0.0327 1.0320 0.183 Uiso 1 1 calc R . .
H13B H 0.8655 -0.1009 0.9114 0.183 Uiso 1 1 calc R . .
H13C H 0.6838 -0.1311 0.9455 0.183 Uiso 1 1 calc R . .
C14 C 0.7992(4) 0.3801(3) -0.0069(3) 0.0601(7) Uani 1 1 d . . .
C15 C 0.7461(5) 0.5136(4) -0.0890(4) 0.0856(11) Uani 1 1 d . . .
H15A H 0.6329 0.5450 -0.0520 0.128 Uiso 1 1 calc R . .
H15B H 0.7601 0.4983 -0.1840 0.128 Uiso 1 1 calc R . .
H15C H 0.8110 0.5838 -0.0841 0.128 Uiso 1 1 calc R . .
 
loop_
 _atom_site_aniso_label
 _atom_site_aniso_U_11
 _atom_site_aniso_U_22
 _atom_site_aniso_U_33
 _atom_site_aniso_U_23
 _atom_site_aniso_U_13
 _atom_site_aniso_U_12
O1 0.0356(8) 0.0401(9) 0.0567(10) -0.0068(7) -0.0055(7) 0.0036(7)
O2 0.0539(11) 0.0653(12) 0.0520(11) -0.0012(9) -0.0051(8) 0.0046(9)
O3 0.0521(10) 0.0414(9) 0.0627(11) -0.0182(8) -0.0097(8) 0.0047(7)
O4 0.0312(8) 0.0432(9) 0.0594(10) -0.0106(8) -0.0051(7) -0.0001(6)
O5 0.0653(15) 0.106(2) 0.0965(19) 0.0165(16) 0.0179(13) 0.0142(14)
O6 0.0441(10) 0.0564(11) 0.0812(14) -0.0012(10) -0.0040(9) 0.0150(9)
C1 0.0333(11) 0.0380(11) 0.0515(13) -0.0090(10) -0.0038(9) -0.0001(9)
C2 0.0382(12) 0.0439(13) 0.0684(17) -0.0054(12) -0.0040(11) -0.0076(10)
C3 0.0458(14) 0.0487(14) 0.0804(19) -0.0130(13) -0.0147(13) -0.0166(11)
C4 0.0392(12) 0.0579(15) 0.0676(17) -0.0165(13) -0.0174(12) -0.0071(11)
C5 0.0315(10) 0.0380(11) 0.0533(13) -0.0103(10) -0.0098(9) 0.0014(8)
C6 0.0332(10) 0.0356(11) 0.0509(13) -0.0103(9) -0.0061(9) -0.0005(8)
C7 0.0369(11) 0.0375(11) 0.0468(12) -0.0064(9) -0.0106(9) 0.0031(9)
C8 0.0547(15) 0.0471(13) 0.0505(14) -0.0078(11) -0.0046(11) 0.0000(11)
C9 0.0316(12) 0.0599(16) 0.0744(19) -0.0059(14) -0.0037(12) 0.0033(11)
C10 0.0360(11) 0.0468(13) 0.0543(14) -0.0083(11) -0.0097(10) 0.0078(10)
C11 0.0617(17) 0.0476(14) 0.0662(18) 0.0005(13) -0.0146(14) -0.0053(12)
C12 0.125(3) 0.072(2) 0.061(2) -0.0111(17) -0.037(2) 0.020(2)
C13 0.179(5) 0.101(3) 0.070(2) -0.008(2) -0.049(3) 0.049(3)
C14 0.0570(17) 0.0655(17) 0.0532(16) -0.0059(13) -0.0050(13) -0.0067(14)
C15 0.090(3) 0.083(2) 0.073(2) 0.0143(19) -0.0149(19) -0.009(2)
 
_geom_special_details
;
 All esds (except the esd in the dihedral angle between two l.s. planes)
 are estimated using the full covariance matrix.  The cell esds are taken
 into account individually in the estimation of esds in distances, angles
 and torsion angles; correlations between esds in cell parameters are only
 used when they are defined by crystal symmetry.  An approximate (isotropic)
 treatment of cell esds is used for estimating esds involving l.s. planes.
;
 
loop_
 _geom_bond_atom_site_label_1
 _geom_bond_atom_site_label_2
 _geom_bond_distance
 _geom_bond_site_symmetry_2
 _geom_bond_publ_flag
O1 C1 1.434(3) . ?
O1 H1 0.8200 . ?
O2 C14 1.340(3) . ?
O2 C8 1.445(3) . ?
O3 C7 1.205(3) . ?
O4 C7 1.339(3) . ?
O4 C9 1.447(3) . ?
O5 C14 1.180(4) . ?
O6 C11 1.423(4) . ?
O6 C10 1.435(3) . ?
C1 C2 1.524(3) . ?
C1 C6 1.527(3) . ?
C1 C8 1.527(4) . ?
C2 C3 1.516(4) . ?
C2 H2A 0.9700 . ?
C2 H2B 0.9700 . ?
C3 C4 1.525(4) . ?
C3 H3A 0.9700 . ?
C3 H3B 0.9700 . ?
C4 C5 1.541(3) . ?
C4 H4A 0.9700 . ?
C4 H4B 0.9700 . ?
C5 C7 1.534(3) . ?
C5 C6 1.544(3) . ?
C5 C10 1.552(3) . ?
C6 H6A 0.9700 . ?
C6 H6B 0.9700 . ?
C8 H8A 0.9700 . ?
C8 H8B 0.9700 . ?
C9 H9A 0.9600 . ?
C9 H9B 0.9600 . ?
C9 H9C 0.9600 . ?
C10 C11 1.463(4) . ?
C10 C12 1.512(4) . ?
C11 H11A 0.9700 . ?
C11 H11B 0.9700 . ?
C12 C13 1.471(5) . ?
C12 H12A 0.9700 . ?
C12 H12B 0.9700 . ?
C13 H13A 0.9600 . ?
C13 H13B 0.9600 . ?
C13 H13C 0.9600 . ?
C14 C15 1.485(5) . ?
C15 H15A 0.9600 . ?
C15 H15B 0.9600 . ?
C15 H15C 0.9600 . ?
 
loop_
 _geom_angle_atom_site_label_1
 _geom_angle_atom_site_label_2
 _geom_angle_atom_site_label_3
 _geom_angle
 _geom_angle_site_symmetry_1
 _geom_angle_site_symmetry_3
 _geom_angle_publ_flag
C1 O1 H1 109.5 . . ?
C14 O2 C8 119.3(2) . . ?
C7 O4 C9 116.17(19) . . ?
C11 O6 C10 61.60(17) . . ?
O1 C1 C2 111.16(18) . . ?
O1 C1 C6 106.04(18) . . ?
C2 C1 C6 110.7(2) . . ?
O1 C1 C8 108.9(2) . . ?
C2 C1 C8 111.2(2) . . ?
C6 C1 C8 108.72(19) . . ?
C3 C2 C1 111.0(2) . . ?
C3 C2 H2A 109.4 . . ?
C1 C2 H2A 109.4 . . ?
C3 C2 H2B 109.4 . . ?
C1 C2 H2B 109.4 . . ?
H2A C2 H2B 108.0 . . ?
C2 C3 C4 111.9(2) . . ?
C2 C3 H3A 109.2 . . ?
C4 C3 H3A 109.2 . . ?
C2 C3 H3B 109.2 . . ?
C4 C3 H3B 109.2 . . ?
H3A C3 H3B 107.9 . . ?
C3 C4 C5 113.6(2) . . ?
C3 C4 H4A 108.8 . . ?
C5 C4 H4A 108.8 . . ?
C3 C4 H4B 108.8 . . ?
C5 C4 H4B 108.8 . . ?
H4A C4 H4B 107.7 . . ?
C7 C5 C4 110.60(19) . . ?
C7 C5 C6 111.16(18) . . ?
C4 C5 C6 108.7(2) . . ?
C7 C5 C10 105.97(19) . . ?
C4 C5 C10 108.7(2) . . ?
C6 C5 C10 111.67(18) . . ?
C1 C6 C5 113.73(18) . . ?
C1 C6 H6A 108.8 . . ?
C5 C6 H6A 108.8 . . ?
C1 C6 H6B 108.8 . . ?
C5 C6 H6B 108.8 . . ?
H6A C6 H6B 107.7 . . ?
O3 C7 O4 123.3(2) . . ?
O3 C7 C5 125.6(2) . . ?
O4 C7 C5 111.06(18) . . ?
O2 C8 C1 109.4(2) . . ?
O2 C8 H8A 109.8 . . ?
C1 C8 H8A 109.8 . . ?
O2 C8 H8B 109.8 . . ?
C1 C8 H8B 109.8 . . ?
H8A C8 H8B 108.2 . . ?
O4 C9 H9A 109.5 . . ?
O4 C9 H9B 109.5 . . ?
H9A C9 H9B 109.5 . . ?
O4 C9 H9C 109.5 . . ?
H9A C9 H9C 109.5 . . ?
H9B C9 H9C 109.5 . . ?
O6 C10 C11 58.80(17) . . ?
O6 C10 C12 114.3(2) . . ?
C11 C10 C12 119.5(3) . . ?
O6 C10 C5 114.1(2) . . ?
C11 C10 C5 121.5(2) . . ?
C12 C10 C5 115.2(2) . . ?
O6 C11 C10 59.60(17) . . ?
O6 C11 H11A 117.8 . . ?
C10 C11 H11A 117.8 . . ?
O6 C11 H11B 117.8 . . ?
C10 C11 H11B 117.8 . . ?
H11A C11 H11B 114.9 . . ?
C13 C12 C10 117.9(3) . . ?
C13 C12 H12A 107.8 . . ?
C10 C12 H12A 107.8 . . ?
C13 C12 H12B 107.8 . . ?
C10 C12 H12B 107.8 . . ?
H12A C12 H12B 107.2 . . ?
C12 C13 H13A 109.5 . . ?
C12 C13 H13B 109.5 . . ?
H13A C13 H13B 109.5 . . ?
C12 C13 H13C 109.5 . . ?
H13A C13 H13C 109.5 . . ?
H13B C13 H13C 109.5 . . ?
O5 C14 O2 123.1(3) . . ?
O5 C14 C15 125.7(3) . . ?
O2 C14 C15 111.2(3) . . ?
C14 C15 H15A 109.5 . . ?
C14 C15 H15B 109.5 . . ?
H15A C15 H15B 109.5 . . ?
C14 C15 H15C 109.5 . . ?
H15A C15 H15C 109.5 . . ?
H15B C15 H15C 109.5 . . ?
 
loop_
 _geom_torsion_atom_site_label_1
 _geom_torsion_atom_site_label_2
 _geom_torsion_atom_site_label_3
 _geom_torsion_atom_site_label_4
 _geom_torsion
 _geom_torsion_site_symmetry_1
 _geom_torsion_site_symmetry_2
 _geom_torsion_site_symmetry_3
 _geom_torsion_site_symmetry_4
 _geom_torsion_publ_flag
O1 C1 C2 C3 61.8(3) . . . . ?
C6 C1 C2 C3 -55.7(3) . . . . ?
C8 C1 C2 C3 -176.7(2) . . . . ?
C1 C2 C3 C4 55.3(3) . . . . ?
C2 C3 C4 C5 -54.5(3) . . . . ?
C3 C4 C5 C7 -70.7(3) . . . . ?
C3 C4 C5 C6 51.6(3) . . . . ?
C3 C4 C5 C10 173.4(2) . . . . ?
O1 C1 C6 C5 -64.6(2) . . . . ?
C2 C1 C6 C5 56.1(2) . . . . ?
C8 C1 C6 C5 178.49(19) . . . . ?
C7 C5 C6 C1 69.1(2) . . . . ?
C4 C5 C6 C1 -52.9(2) . . . . ?
C10 C5 C6 C1 -172.81(18) . . . . ?
C9 O4 C7 O3 6.9(3) . . . . ?
C9 O4 C7 C5 -176.5(2) . . . . ?
C4 C5 C7 O3 -7.6(3) . . . . ?
C6 C5 C7 O3 -128.5(3) . . . . ?
C10 C5 C7 O3 110.0(3) . . . . ?
C4 C5 C7 O4 175.9(2) . . . . ?
C6 C5 C7 O4 55.0(3) . . . . ?
C10 C5 C7 O4 -66.5(2) . . . . ?
C14 O2 C8 C1 113.4(3) . . . . ?
O1 C1 C8 O2 57.1(3) . . . . ?
C2 C1 C8 O2 -65.7(3) . . . . ?
C6 C1 C8 O2 172.23(19) . . . . ?
C11 O6 C10 C12 111.0(3) . . . . ?
C11 O6 C10 C5 -113.5(3) . . . . ?
C7 C5 C10 O6 168.9(2) . . . . ?
C4 C5 C10 O6 -72.2(3) . . . . ?
C6 C5 C10 O6 47.8(3) . . . . ?
C7 C5 C10 C11 102.0(3) . . . . ?
C4 C5 C10 C11 -139.1(2) . . . . ?
C6 C5 C10 C11 -19.2(3) . . . . ?
C7 C5 C10 C12 -56.0(3) . . . . ?
C4 C5 C10 C12 62.9(3) . . . . ?
C6 C5 C10 C12 -177.2(3) . . . . ?
C12 C10 C11 O6 -102.1(3) . . . . ?
C5 C10 C11 O6 100.8(2) . . . . ?
O6 C10 C12 C13 -41.0(5) . . . . ?
C11 C10 C12 C13 25.6(6) . . . . ?
C5 C10 C12 C13 -176.0(4) . . . . ?
C8 O2 C14 O5 4.6(5) . . . . ?
C8 O2 C14 C15 -175.0(3) . . . . ?
 
loop_
 _geom_hbond_atom_site_label_D
 _geom_hbond_atom_site_label_H
 _geom_hbond_atom_site_label_A
 _geom_hbond_distance_DH
 _geom_hbond_distance_HA
 _geom_hbond_distance_DA
 _geom_hbond_angle_DHA
 _geom_hbond_site_symmetry_A
O1 H1 O3  0.82 2.14 2.934(2) 163.3 2_666
 
_diffrn_measured_fraction_theta_max    0.977
_diffrn_reflns_theta_full              27.49
_diffrn_measured_fraction_theta_full   0.977
_refine_diff_density_max    0.316
_refine_diff_density_min   -0.335
_refine_diff_density_rms    0.105


#-end-end-end-end-end-end-end-end-end-end-end-end-end-end-end-end-end-end
 
#=======================================================================
#  Data block for (48) (one for each study in the paper)
#=======================================================================

data_js-2(48)
 
_audit_creation_method            SHELXL-97
_chemical_name_systematic
;
 (4R*, 5R*, 7S*)-4-ethyl-4,7-dihidroxy-7-
hydroxymethyl-2-oxa-spiro[4.5]decan-1-one
;
_chemical_name_common             ?
_chemical_melting_point           ?
_chemical_formula_moiety          'C12 H20 O5'

_chemical_formula_sum
 'C12 H20 O5'
_chemical_formula_weight          244.28
 
loop_
 _atom_type_symbol
 _atom_type_description
 _atom_type_scat_dispersion_real
 _atom_type_scat_dispersion_imag
 _atom_type_scat_source
 'C'  'C'   0.0033   0.0016
 'International Tables Vol C Tables 4.2.6.8 and 6.1.1.4'
 'H'  'H'   0.0000   0.0000
 'International Tables Vol C Tables 4.2.6.8 and 6.1.1.4'
 'O'  'O'   0.0106   0.0060
 'International Tables Vol C Tables 4.2.6.8 and 6.1.1.4'
 
_symmetry_cell_setting            'Monoclinic'
_symmetry_space_group_name_H-M    'P21/c'
 
loop_
 _symmetry_equiv_pos_as_xyz
 'x, y, z'
 '-x, y+1/2, -z+1/2'
 '-x, -y, -z'
 'x, -y-1/2, z-1/2'
 
_cell_length_a                    9.4080(3)
_cell_length_b                    10.1670(3)
_cell_length_c                    13.3930(4)
_cell_angle_alpha                 90.00
_cell_angle_beta                  106.5350(10)
_cell_angle_gamma                 90.00
_cell_volume                      1228.08(6)
_cell_formula_units_Z             4
_cell_measurement_temperature     293(2)
_cell_measurement_reflns_used     2802
_cell_measurement_theta_min       2.26
_cell_measurement_theta_max       27.49

_computing_cell_refinement 'HKL Denzo and Scalepack (Otwinowski & Minor 1997)'

 
_exptl_crystal_description        plate
_exptl_crystal_colour             colourless
_exptl_crystal_size_max           0.50
_exptl_crystal_size_mid           0.30
_exptl_crystal_size_min           0.05
_exptl_crystal_density_meas       ?
_exptl_crystal_density_diffrn     1.321
_exptl_crystal_density_method     'not measured'
_exptl_crystal_F_000              528
_exptl_absorpt_coefficient_mu     0.102
_exptl_absorpt_correction_type    none
_exptl_absorpt_correction_T_min   0.9508
_exptl_absorpt_correction_T_max   0.9949
_exptl_absorpt_process_details    ?
 
_exptl_special_details
;
 ?
;
 
_diffrn_ambient_temperature       293(2)
_diffrn_radiation_wavelength      0.71073
_diffrn_radiation_type            MoK\a
_diffrn_radiation_source          'fine-focus sealed tube'
_diffrn_measurement_device_type  'KappaCCD'
_diffrn_measurement_device  '95mm CCD camera on \k-goniostat'
_diffrn_detector_area_resol_mean    9
_diffrn_radiation_monochromator        'horizontally mounted graphite crystal'
_diffrn_measurement_method     '\f and \w'

_diffrn_reflns_number             2802
_diffrn_reflns_av_R_equivalents   0.0000
_diffrn_reflns_av_sigmaI/netI     0.0443
_diffrn_reflns_limit_h_min        0
_diffrn_reflns_limit_h_max        12
_diffrn_reflns_limit_k_min        0
_diffrn_reflns_limit_k_max        13
_diffrn_reflns_limit_l_min        -17
_diffrn_reflns_limit_l_max        16
_diffrn_reflns_theta_min          2.26
_diffrn_reflns_theta_max          27.49
_reflns_number_total              2802
_reflns_number_gt                 2160
_reflns_threshold_expression      >2sigma(I)
 
_computing_data_collection 'Collect (Nonius BV, 2000)'
_computing_data_reduction  'HKL Denzo and Scalepak (Otwinowski & Minor, 1997)'
_computing_structure_solution     'SIR97 (Altomare et al., 1999)'
_computing_structure_refinement   'SHELXL-97 (Sheldrick, 1997)'
_computing_molecular_graphics  
  'PLATON (Spek, 2003)'
_computing_publication_material  
'SHELXL-97, WinGX (Farrugia, 1999) and PLATON'
  
_refine_special_details
;
 Refinement of F^2^ against ALL reflections.  The weighted R-factor wR and
 goodness of fit S are based on F^2^, conventional R-factors R are based
 on F, with F set to zero for negative F^2^. The threshold expression of
 F^2^ > 2sigma(F^2^) is used only for calculating R-factors(gt) etc. and is
 not relevant to the choice of reflections for refinement.  R-factors based
 on F^2^ are statistically about twice as large as those based on F, and R-
 factors based on ALL data will be even larger.
;
 
_refine_ls_structure_factor_coef  Fsqd
_refine_ls_matrix_type            full
_refine_ls_weighting_scheme       calc
_refine_ls_weighting_details
 'calc w=1/[\s^2^(Fo^2^)+(0.0956P)^2^+0.4717P] where P=(Fo^2^+2Fc^2^)/3'
_atom_sites_solution_primary      direct
_atom_sites_solution_secondary    difmap
_atom_sites_solution_hydrogens    geom
_refine_ls_hydrogen_treatment     mixed
_refine_ls_extinction_method      none
_refine_ls_extinction_coef        ?
_refine_ls_number_reflns          2802
_refine_ls_number_parameters      154
_refine_ls_number_restraints      0
_refine_ls_R_factor_all           0.0844
_refine_ls_R_factor_gt            0.0579
_refine_ls_wR_factor_ref          0.1862
_refine_ls_wR_factor_gt           0.1540
_refine_ls_goodness_of_fit_ref    1.060
_refine_ls_restrained_S_all       1.060
_refine_ls_shift/su_max           0.001
_refine_ls_shift/su_mean          0.000
 
loop_
 _atom_site_label
 _atom_site_type_symbol
 _atom_site_fract_x
 _atom_site_fract_y
 _atom_site_fract_z
 _atom_site_U_iso_or_equiv
 _atom_site_adp_type
 _atom_site_occupancy
 _atom_site_symmetry_multiplicity
 _atom_site_calc_flag
 _atom_site_refinement_flags
 _atom_site_disorder_assembly
 _atom_site_disorder_group
O1 O 0.11834(17) 0.12044(15) 0.08805(13) 0.0428(4) Uani 1 1 d . . .
H1 H 0.1656 0.1337 0.1488 0.051 Uiso 1 1 d R . .
O2 O 0.17378(18) -0.03771(16) -0.06664(14) 0.0535(5) Uani 1 1 d . . .
H2 H 0.0994 -0.0763 -0.0619 0.064 Uiso 1 1 d R . .
O3 O 0.31143(19) 0.17366(18) 0.27702(13) 0.0511(5) Uani 1 1 d . . .
O4 O 0.53336(19) 0.26163(17) 0.33651(11) 0.0486(5) Uani 1 1 d . . .
O5 O 0.65616(18) 0.12676(14) 0.19073(13) 0.0431(4) Uani 1 1 d . . .
H5 H 0.7020 0.1121 0.1482 0.052 Uiso 1 1 d R . .
C1 C 0.1958(2) 0.17798(19) 0.01981(16) 0.0329(5) Uani 1 1 d . . .
C2 C 0.1471(3) 0.3208(2) -0.00210(19) 0.0425(6) Uani 1 1 d . . .
H2A H 0.1822 0.3537 -0.0588 0.051 Uiso 1 1 d R . .
H2B H 0.0397 0.3251 -0.0238 0.051 Uiso 1 1 d R . .
C3 C 0.2065(2) 0.4071(2) 0.0926(2) 0.0425(6) Uani 1 1 d . . .
H3A H 0.1690 0.3766 0.1488 0.051 Uiso 1 1 d R . .
H3B H 0.1730 0.4968 0.0760 0.051 Uiso 1 1 d R . .
C4 C 0.3750(2) 0.40341(19) 0.12698(17) 0.0349(5) Uani 1 1 d . . .
H4A H 0.4111 0.4590 0.1878 0.042 Uiso 1 1 d R . .
H4B H 0.4116 0.4393 0.0719 0.042 Uiso 1 1 d R . .
C5 C 0.4382(2) 0.26282(17) 0.15351(15) 0.0265(4) Uani 1 1 d . . .
C6 C 0.3643(2) 0.16760(18) 0.06453(15) 0.0282(4) Uani 1 1 d . . .
H6A H 0.4085 0.1816 0.0082 0.034 Uiso 1 1 d R . .
H6B H 0.3882 0.0785 0.0895 0.034 Uiso 1 1 d R . .
C7 C 0.4167(3) 0.2258(2) 0.25812(17) 0.0359(5) Uani 1 1 d . . .
C8 C 0.1434(3) 0.0994(2) -0.08059(19) 0.0452(6) Uani 1 1 d . . .
H8A H 0.0373 0.1117 -0.1096 0.054 Uiso 1 1 d R . .
H8B H 0.1913 0.1335 -0.1305 0.054 Uiso 1 1 d R . .
C9 C 0.6501(3) 0.3120(3) 0.29529(18) 0.0444(6) Uani 1 1 d . . .
H9A H 0.7463 0.2795 0.3355 0.053 Uiso 1 1 d R . .
H9B H 0.6517 0.4074 0.2965 0.053 Uiso 1 1 d R . .
C10 C 0.6109(2) 0.26099(18) 0.18364(15) 0.0306(5) Uani 1 1 d . . .
C11 C 0.6827(2) 0.3405(2) 0.11472(17) 0.0367(5) Uani 1 1 d . . .
H11A H 0.6398 0.4280 0.1057 0.044 Uiso 1 1 d R . .
H11B H 0.6596 0.2994 0.0466 0.044 Uiso 1 1 d R . .
C12 C 0.8502(3) 0.3525(3) 0.1578(2) 0.0496(6) Uani 1 1 d . . .
H12A H 0.8882 0.4038 0.1109 0.059 Uiso 1 1 d R . .
H12B H 0.8939 0.2664 0.1651 0.059 Uiso 1 1 d R . .
H12C H 0.8741 0.3948 0.2246 0.059 Uiso 1 1 d R . .
 
loop_
 _atom_site_aniso_label
 _atom_site_aniso_U_11
 _atom_site_aniso_U_22
 _atom_site_aniso_U_33
 _atom_site_aniso_U_23
 _atom_site_aniso_U_13
 _atom_site_aniso_U_12
O1 0.0374(9) 0.0490(9) 0.0491(9) -0.0064(7) 0.0240(7) -0.0135(7)
O2 0.0520(10) 0.0453(10) 0.0732(12) -0.0244(8) 0.0342(9) -0.0149(8)
O3 0.0567(11) 0.0626(11) 0.0445(10) 0.0018(8) 0.0312(9) -0.0086(8)
O4 0.0517(10) 0.0698(12) 0.0264(8) -0.0023(7) 0.0144(7) -0.0052(8)
O5 0.0447(9) 0.0379(8) 0.0534(10) 0.0114(7) 0.0247(8) 0.0147(6)
C1 0.0300(11) 0.0353(11) 0.0368(11) -0.0023(8) 0.0150(9) -0.0044(8)
C2 0.0331(12) 0.0425(13) 0.0487(14) 0.0029(10) 0.0065(10) 0.0055(9)
C3 0.0386(12) 0.0309(11) 0.0595(15) -0.0018(10) 0.0163(11) 0.0097(9)
C4 0.0359(11) 0.0237(10) 0.0459(12) -0.0038(8) 0.0129(9) 0.0011(8)
C5 0.0292(10) 0.0247(9) 0.0286(10) -0.0009(7) 0.0129(8) 0.0005(7)
C6 0.0320(10) 0.0248(9) 0.0326(10) -0.0023(7) 0.0172(8) -0.0010(7)
C7 0.0430(12) 0.0362(11) 0.0340(11) 0.0001(9) 0.0197(10) 0.0032(9)
C8 0.0403(13) 0.0508(14) 0.0448(13) -0.0093(10) 0.0124(11) -0.0116(10)
C9 0.0383(13) 0.0589(14) 0.0350(12) -0.0025(10) 0.0086(10) -0.0049(10)
C10 0.0298(10) 0.0317(10) 0.0314(10) 0.0008(8) 0.0107(8) 0.0026(8)
C11 0.0323(11) 0.0413(12) 0.0380(12) 0.0041(9) 0.0125(9) -0.0041(9)
C12 0.0337(12) 0.0556(15) 0.0601(16) 0.0016(12) 0.0144(11) -0.0050(10)
 
_geom_special_details
;
 All esds (except the esd in the dihedral angle between two l.s. planes)
 are estimated using the full covariance matrix.  The cell esds are taken
 into account individually in the estimation of esds in distances, angles
 and torsion angles; correlations between esds in cell parameters are only
 used when they are defined by crystal symmetry.  An approximate (isotropic)
 treatment of cell esds is used for estimating esds involving l.s. planes.
;
 
loop_
 _geom_bond_atom_site_label_1
 _geom_bond_atom_site_label_2
 _geom_bond_distance
 _geom_bond_site_symmetry_2
 _geom_bond_publ_flag
O1 C1 1.445(2) . ?
O1 H1 0.8200 . ?
O2 C8 1.424(3) . ?
O2 H2 0.8200 . ?
O3 C7 1.212(3) . ?
O4 C7 1.335(3) . ?
O4 C9 1.455(3) . ?
O5 C10 1.425(2) . ?
O5 H5 0.8201 . ?
C1 C8 1.521(3) . ?
C1 C2 1.526(3) . ?
C1 C6 1.531(3) . ?
C2 C3 1.512(3) . ?
C2 H2A 0.9700 . ?
C2 H2B 0.9700 . ?
C3 C4 1.520(3) . ?
C3 H3A 0.9700 . ?
C3 H3B 0.9700 . ?
C4 C5 1.550(3) . ?
C4 H4A 0.9699 . ?
C4 H4B 0.9700 . ?
C5 C7 1.519(3) . ?
C5 C6 1.539(3) . ?
C5 C10 1.559(3) . ?
C6 H6A 0.9700 . ?
C6 H6B 0.9699 . ?
C8 H8A 0.9701 . ?
C8 H8B 0.9700 . ?
C9 C10 1.525(3) . ?
C9 H9A 0.9700 . ?
C9 H9B 0.9700 . ?
C10 C11 1.522(3) . ?
C11 C12 1.521(3) . ?
C11 H11A 0.9700 . ?
C11 H11B 0.9700 . ?
C12 H12A 0.9600 . ?
C12 H12B 0.9600 . ?
C12 H12C 0.9600 . ?
 
loop_
 _geom_angle_atom_site_label_1
 _geom_angle_atom_site_label_2
 _geom_angle_atom_site_label_3
 _geom_angle
 _geom_angle_site_symmetry_1
 _geom_angle_site_symmetry_3
 _geom_angle_publ_flag
C1 O1 H1 109.4 . . ?
C8 O2 H2 109.5 . . ?
C7 O4 C9 109.74(16) . . ?
C10 O5 H5 109.5 . . ?
O1 C1 C8 104.57(16) . . ?
O1 C1 C2 109.23(17) . . ?
C8 C1 C2 109.03(19) . . ?
O1 C1 C6 112.16(17) . . ?
C8 C1 C6 110.41(17) . . ?
C2 C1 C6 111.20(16) . . ?
C3 C2 C1 111.82(18) . . ?
C3 C2 H2A 109.2 . . ?
C1 C2 H2A 109.2 . . ?
C3 C2 H2B 109.3 . . ?
C1 C2 H2B 109.3 . . ?
H2A C2 H2B 107.9 . . ?
C2 C3 C4 110.18(18) . . ?
C2 C3 H3A 109.6 . . ?
C4 C3 H3A 109.6 . . ?
C2 C3 H3B 109.6 . . ?
C4 C3 H3B 109.6 . . ?
H3A C3 H3B 108.1 . . ?
C3 C4 C5 113.01(16) . . ?
C3 C4 H4A 109.0 . . ?
C5 C4 H4A 109.0 . . ?
C3 C4 H4B 109.0 . . ?
C5 C4 H4B 109.0 . . ?
H4A C4 H4B 107.8 . . ?
C7 C5 C6 114.15(16) . . ?
C7 C5 C4 107.28(15) . . ?
C6 C5 C4 110.09(16) . . ?
C7 C5 C10 99.25(15) . . ?
C6 C5 C10 113.62(15) . . ?
C4 C5 C10 111.95(15) . . ?
C1 C6 C5 116.66(15) . . ?
C1 C6 H6A 108.1 . . ?
C5 C6 H6A 108.1 . . ?
C1 C6 H6B 108.2 . . ?
C5 C6 H6B 108.1 . . ?
H6A C6 H6B 107.3 . . ?
O3 C7 O4 119.52(19) . . ?
O3 C7 C5 129.2(2) . . ?
O4 C7 C5 111.25(18) . . ?
O2 C8 C1 113.3(2) . . ?
O2 C8 H8A 108.9 . . ?
C1 C8 H8A 108.9 . . ?
O2 C8 H8B 109.0 . . ?
C1 C8 H8B 108.9 . . ?
H8A C8 H8B 107.7 . . ?
O4 C9 C10 104.75(17) . . ?
O4 C9 H9A 110.8 . . ?
C10 C9 H9A 110.8 . . ?
O4 C9 H9B 110.8 . . ?
C10 C9 H9B 110.8 . . ?
H9A C9 H9B 108.9 . . ?
O5 C10 C11 111.93(16) . . ?
O5 C10 C9 106.02(17) . . ?
C11 C10 C9 112.90(18) . . ?
O5 C10 C5 107.35(15) . . ?
C11 C10 C5 116.50(16) . . ?
C9 C10 C5 101.12(15) . . ?
C10 C11 C12 113.78(19) . . ?
C10 C11 H11A 108.8 . . ?
C12 C11 H11A 108.8 . . ?
C10 C11 H11B 108.8 . . ?
C12 C11 H11B 108.7 . . ?
H11A C11 H11B 107.7 . . ?
C11 C12 H12A 109.5 . . ?
C11 C12 H12B 109.5 . . ?
H12A C12 H12B 109.5 . . ?
C11 C12 H12C 109.4 . . ?
H12A C12 H12C 109.5 . . ?
H12B C12 H12C 109.5 . . ?
 
loop_
 _geom_torsion_atom_site_label_1
 _geom_torsion_atom_site_label_2
 _geom_torsion_atom_site_label_3
 _geom_torsion_atom_site_label_4
 _geom_torsion
 _geom_torsion_site_symmetry_1
 _geom_torsion_site_symmetry_2
 _geom_torsion_site_symmetry_3
 _geom_torsion_site_symmetry_4
 _geom_torsion_publ_flag
O1 C1 C2 C3 71.0(2) . . . . ?
C8 C1 C2 C3 -175.26(18) . . . . ?
C6 C1 C2 C3 -53.3(2) . . . . ?
C1 C2 C3 C4 59.7(2) . . . . ?
C2 C3 C4 C5 -58.5(2) . . . . ?
C3 C4 C5 C7 -74.7(2) . . . . ?
C3 C4 C5 C6 50.0(2) . . . . ?
C3 C4 C5 C10 177.38(17) . . . . ?
O1 C1 C6 C5 -75.6(2) . . . . ?
C8 C1 C6 C5 168.25(17) . . . . ?
C2 C1 C6 C5 47.1(2) . . . . ?
C7 C5 C6 C1 75.8(2) . . . . ?
C4 C5 C6 C1 -44.9(2) . . . . ?
C10 C5 C6 C1 -171.38(16) . . . . ?
C9 O4 C7 O3 175.4(2) . . . . ?
C9 O4 C7 C5 -6.1(2) . . . . ?
C6 C5 C7 O3 -33.7(3) . . . . ?
C4 C5 C7 O3 88.5(3) . . . . ?
C10 C5 C7 O3 -154.9(2) . . . . ?
C6 C5 C7 O4 147.96(17) . . . . ?
C4 C5 C7 O4 -89.8(2) . . . . ?
C10 C5 C7 O4 26.8(2) . . . . ?
O1 C1 C8 O2 -58.8(2) . . . . ?
C2 C1 C8 O2 -175.54(18) . . . . ?
C6 C1 C8 O2 62.0(2) . . . . ?
C7 O4 C9 C10 -18.3(2) . . . . ?
O4 C9 C10 O5 -78.3(2) . . . . ?
O4 C9 C10 C11 158.84(17) . . . . ?
O4 C9 C10 C5 33.6(2) . . . . ?
C7 C5 C10 O5 75.80(17) . . . . ?
C6 C5 C10 O5 -45.8(2) . . . . ?
C4 C5 C10 O5 -171.25(16) . . . . ?
C7 C5 C10 C11 -157.83(17) . . . . ?
C6 C5 C10 C11 80.6(2) . . . . ?
C4 C5 C10 C11 -44.9(2) . . . . ?
C7 C5 C10 C9 -35.06(18) . . . . ?
C6 C5 C10 C9 -156.64(17) . . . . ?
C4 C5 C10 C9 77.9(2) . . . . ?
O5 C10 C11 C12 -65.2(2) . . . . ?
C9 C10 C11 C12 54.4(3) . . . . ?
C5 C10 C11 C12 170.78(18) . . . . ?
 
loop_
 _geom_hbond_atom_site_label_D
 _geom_hbond_atom_site_label_H
 _geom_hbond_atom_site_label_A
 _geom_hbond_distance_DH
 _geom_hbond_distance_HA
 _geom_hbond_distance_DA
 _geom_hbond_angle_DHA
 _geom_hbond_site_symmetry_A
O5 H5 O2  0.82 1.96 2.767(2) 165.9 3_655
O1 H1 O3  0.82 1.91 2.717(2) 167.0 .
O2 H2 O1  0.82 2.03 2.810(2) 159.2 3
 
_diffrn_measured_fraction_theta_max    0.995
_diffrn_reflns_theta_full              27.49
_diffrn_measured_fraction_theta_full   0.995
_refine_diff_density_max    0.351
_refine_diff_density_min   -0.304
_refine_diff_density_rms    0.110

#-end-end-end-end-end-end-end-end-end-end-end-end-end-end-end-end-end-end
#=======================================================================
